# Supplementary material for: Coinage metal complexes of multidentate Pacman phosphane ligands
Source: Royal Society of Chemistry journal article supplement (doi:10.1039/d3cc01174g), 2023-01-01
Supplement: d3cc01174g9.pdf [file d3cc01174g9.pdf]

## SUPPORTING INFORMATION

### Coinage metal complexes of multidentate Pacman phosphane ligands

*Leon Ohms, Liesa Eickhoff, Pascal Kramer, Alexander Villinger, Jonas Bresien and Axel  
Schulz\**

**This file includes:**

|   |                                       |    |
|---|---------------------------------------|----|
| 1 | Experimental .....                    | 2  |
| 2 | Structure elucidation.....            | 4  |
| 3 | Syntheses of starting materials ..... | 10 |
| 4 | Syntheses of compounds .....          | 12 |
| 5 | Computational details .....           | 42 |
| 6 | References.....                       | 45 |

# 1 Experimental

**General information.** If not stated otherwise, all manipulations were carried out under oxygen- and moisture-free conditions in an inert argon atmosphere using standard Schlenk or drybox techniques. All glassware was heated three times *in vacuo* using a heat gun (650 °C) and cooled under argon atmosphere. Solvents were transferred using syringes, which were purged three times with argon prior to use. Solvents and reactants were either obtained from commercial sources or synthesized as detailed in Table S1.

**Table S1:** Origin and purification of solvents and reactants.

| Substance                       | Origin                     | Purification                                                                                                                                                                               |
|---------------------------------|----------------------------|--------------------------------------------------------------------------------------------------------------------------------------------------------------------------------------------|
| CH <sub>2</sub> Cl <sub>2</sub> | local trade                | purified according to literature procedure <sup>[1]</sup><br>dried over P <sub>4</sub> O <sub>10</sub> , stored over CaH <sub>2</sub><br>freshly distilled and degassed (freeze-pump-thaw) |
| Et <sub>2</sub> O               | local trade                | dried over Na/benzophenone<br>freshly distilled prior to use                                                                                                                               |
| THF                             | Fisher Scientific, 99.5%   | dried over Na/benzophenone<br>freshly distilled prior to use                                                                                                                               |
| <i>n</i> -heptane               | local trade                | dried over Na/benzophenone/tetraglyme<br>freshly distilled prior to use                                                                                                                    |
| AgOTf                           | J & K, 98 %                | used as received                                                                                                                                                                           |
| CODPdCl <sub>2</sub>            | old stock                  | -                                                                                                                                                                                          |
| CuOTf                           | old stock                  | -                                                                                                                                                                                          |
| ( <i>i</i> Pr) <sub>2</sub> NH  | Sigma Aldrich, 99 %        | dried over Na<br>freshly distilled prior to use                                                                                                                                            |
| Me <sub>2</sub> SAuCl           | old stock                  | -                                                                                                                                                                                          |
| NEt <sub>3</sub>                | Sigma Aldrich, 99%         | dried over Na<br>freshly distilled prior to use                                                                                                                                            |
| Pacman ligand                   | synthesized <sup>[2]</sup> | purified according to literature procedure <sup>[2]</sup>                                                                                                                                  |
| PCl <sub>3</sub>                | Merck, for synthesis       | dried over P <sub>4</sub> O <sub>10</sub><br>freshly distilled and degassed (freeze-pump-thaw)                                                                                             |
| PhPCl <sub>2</sub>              | old stock                  | -                                                                                                                                                                                          |
| CD <sub>2</sub> Cl <sub>2</sub> | euriso-top                 | dried over P <sub>4</sub> O <sub>10</sub> and CaH <sub>2</sub><br>freshly distilled prior to use                                                                                           |

**NMR spectra** were recorded on Bruker spectrometers (AVANCE 250, AVANCE 300 or AVANCE 500) and were referenced internally to the deuterated solvent ( $^{13}\text{C}$ :  $\text{CD}_2\text{Cl}_2$   $\delta_{\text{ref}} = 54.0$  ppm), to protic impurities in the deuterated solvent ( $^1\text{H}$ :  $\text{CHDCl}_2$   $\delta_{\text{ref}} = 5.32$  ppm) or externally ( $^{31}\text{P}$ : 85%  $\text{H}_3\text{PO}_4$   $\delta_{\text{ref}} = 0$  ppm). All measurements were carried out at ambient temperature unless denoted otherwise. NMR signals were assigned using experimental data (e.g. chemical shifts, coupling constants, integrals where applicable, 2D NMR spectra)

**IR spectra** of crystalline samples were recorded on a Bruker Alpha II FT-IR spectrometer equipped with an ATR unit at ambient temperature under argon atmosphere. Relative intensities are reported according to the following intervals: very weak (vw, 0–10%), weak (w, 10–30%), medium (m, 30–60%), strong (s, 60–90%), very strong (vs, 90–100%).

**Raman spectra** of crystalline samples were recorded using a LabRAM HR 800 Horiba Jobin YVON Raman spectrometer equipped with an Olympus BX41 microscope with variable lenses. The samples were excited by an infrared laser (785 nm, 100 mW, air-cooled diode laser) or a red laser (633 nm, 17 mW, air-cooled HeNe laser). All measurements were carried out at ambient temperature unless stated otherwise.

**Elemental analyses** were obtained using an Elementar vario Micro cube CHNS analyser.

**Melting points** (uncorrected) were determined using a Stanford Research Systems EZ Melt at a heating rate of 20 °C/min. Decomposition processes were confirmed by DSC analyses.

**DSC** analyses were carried out at a heating rate of 5 °C/min using a Mettler-Toledo DSC 823e.

**Mass spectra** were recorded on an Advion Expression L benchtop mass spectrometer ( $m/z$  10–2000) equipped with an Advion Expression CMS detector using sample solutions (APCI, ESI) or crystalline samples (APCI).

## 2 Structure elucidation

**X-ray structure determination:** X-ray quality crystals were selected in Fomblin YR-1800 perfluoroether (Alfa Aesar) at ambient temperature. The samples were cooled to 123(2) K during measurement except sample **1. 1** was measured at 203(2) K. The data were collected on a Bruker D8 Quest diffractometer or a Bruker Kappa Apex II diffractometer using Mo K $\alpha$  radiation ( $\lambda = 0.71073 \text{ \AA}$ ). The structures were solved by iterative methods (SHELXT)<sup>[3]</sup> and refined by full matrix least squares procedures (SHELXL).<sup>[4]</sup> Semi-empirical absorption corrections were applied (SADABS).<sup>[5]</sup> All non-hydrogen atoms were refined anisotropically, hydrogen atoms were included in the refinement at calculated positions using a riding model.

**Table S2:** Crystallographic details of the compounds **1** and **2**.

| Compound                                          | <b>1</b>                                                                                          | <b>2</b>                                                                                            |
|---------------------------------------------------|---------------------------------------------------------------------------------------------------|-----------------------------------------------------------------------------------------------------|
| Chem. Formula                                     | C <sub>58</sub> H <sub>58</sub> N <sub>8</sub> P <sub>2</sub> ·4(C <sub>4</sub> H <sub>8</sub> O) | C <sub>58</sub> H <sub>76</sub> N <sub>10</sub> P <sub>2</sub> ·2(CH <sub>2</sub> Cl <sub>2</sub> ) |
| Formula weight [g/mol]                            | 1217.47                                                                                           | 1145.08                                                                                             |
| Colour                                            | colourless                                                                                        | yellow                                                                                              |
| Crystal system                                    | triclinic                                                                                         | triclinic                                                                                           |
| Space group                                       | $P\bar{1}$                                                                                        | $P\bar{1}$                                                                                          |
| <i>a</i> [Å]                                      | 14.3958(8)                                                                                        | 12.004(5)                                                                                           |
| <i>b</i> [Å]                                      | 14.8111(8)                                                                                        | 14.462(6)                                                                                           |
| <i>c</i> [Å]                                      | 18.1114(10)                                                                                       | 19.647(9)                                                                                           |
| $\alpha$ [°]                                      | 75.619(2)                                                                                         | 75.746(19)                                                                                          |
| $\beta$ [°]                                       | 89.545(2)                                                                                         | 84.619(19)                                                                                          |
| $\gamma$ [°]                                      | 65.078(2)                                                                                         | 66.815(12)                                                                                          |
| <i>V</i> [Å <sup>3</sup> ]                        | 3371.7(3)                                                                                         | 3039(2)                                                                                             |
| <i>Z</i>                                          | 2                                                                                                 | 2                                                                                                   |
| $\rho_{\text{calcd.}}$ [g/cm <sup>3</sup> ]       | 1.199                                                                                             | 1.251                                                                                               |
| $\mu$ [mm <sup>-1</sup> ]                         | 0.119                                                                                             | 0.294                                                                                               |
| <i>T</i> [K]                                      | 203(2)                                                                                            | 123(2)                                                                                              |
| Measured reflections                              | 194764                                                                                            | 23243                                                                                               |
| Independent reflections                           | 19634                                                                                             | 23243                                                                                               |
| Reflections with $I > 2\sigma(I)$                 | 15606                                                                                             | 14852                                                                                               |
| <i>R</i> <sub>int</sub>                           | 0.0407                                                                                            | 0.0491                                                                                              |
| <i>F</i> (000)                                    | 1304                                                                                              | 1216                                                                                                |
| <i>R</i> <sub>1</sub> ( $R[F^2 > 2\sigma(F^2)]$ ) | 0.0447                                                                                            | 0.0688                                                                                              |
| <i>wR</i> <sub>2</sub> ( <i>F</i> <sup>2</sup> )  | 0.1265                                                                                            | 0.1714                                                                                              |
| GooF                                              | 1.089                                                                                             | 1.024                                                                                               |
| No. of Parameters                                 | 621                                                                                               | 817                                                                                                 |
| CCDC #                                            | 2226460                                                                                           | 2226461                                                                                             |

**Table S3:** Crystallographic details of the compounds **[1Au][Cl]** and **[1Ag][OTf]**.

| Compound                                                                                          | <b>[1Au][Cl]</b>                                                                                                                       | <b>[1Ag][OTf]</b>                                                                                                                                               |
|---------------------------------------------------------------------------------------------------|----------------------------------------------------------------------------------------------------------------------------------------|-----------------------------------------------------------------------------------------------------------------------------------------------------------------|
| Chem. Formula                                                                                     | C <sub>58</sub> H <sub>58</sub> AuN <sub>8</sub> P <sub>2</sub> <sup>+</sup> ·Cl <sup>-</sup> ·3.825(CH <sub>2</sub> Cl <sub>2</sub> ) | C <sub>58</sub> H <sub>58</sub> AgN <sub>8</sub> P <sub>2</sub> <sup>+</sup> ·CF <sub>3</sub> O <sub>3</sub> S <sup>-</sup> ·2(C <sub>4</sub> H <sub>8</sub> O) |
| Formula weight [g/mol]                                                                            | 1486.50                                                                                                                                | 1330.21                                                                                                                                                         |
| Colour                                                                                            | yellow                                                                                                                                 | yellow                                                                                                                                                          |
| Crystal system                                                                                    | monoclinic                                                                                                                             | monoclinic                                                                                                                                                      |
| Space group                                                                                       | <i>P</i> 2 <sub>1</sub> / <i>m</i>                                                                                                     | <i>P</i> <i>c</i>                                                                                                                                               |
| <i>a</i> [Å]                                                                                      | 14.2272(17)                                                                                                                            | 20.6611(12)                                                                                                                                                     |
| <i>b</i> [Å]                                                                                      | 13.2929(16)                                                                                                                            | 19.3470(12)                                                                                                                                                     |
| <i>c</i> [Å]                                                                                      | 17.217(2)                                                                                                                              | 16.2836(11)                                                                                                                                                     |
| $\alpha$ [°]                                                                                      | 90                                                                                                                                     | 90                                                                                                                                                              |
| $\beta$ [°]                                                                                       | 94.275(3)                                                                                                                              | 104.971(2)                                                                                                                                                      |
| $\gamma$ [°]                                                                                      | 90                                                                                                                                     | 90                                                                                                                                                              |
| <i>V</i> [Å <sup>3</sup> ]                                                                        | 3247.1(7)                                                                                                                              | 6288.1(7)                                                                                                                                                       |
| <i>Z</i>                                                                                          | 2                                                                                                                                      | 4                                                                                                                                                               |
| $\rho_{\text{calcd.}}$ [g/cm <sup>3</sup> ]                                                       | 1.520                                                                                                                                  | 1.405                                                                                                                                                           |
| $\mu$ [mm <sup>-1</sup> ]                                                                         | 2.716                                                                                                                                  | 0.471                                                                                                                                                           |
| <i>T</i> [K]                                                                                      | 123(2)                                                                                                                                 | 123(2)                                                                                                                                                          |
| Measured reflections                                                                              | 16939                                                                                                                                  | 250644                                                                                                                                                          |
| Independent reflections                                                                           | 16939                                                                                                                                  | 44710                                                                                                                                                           |
| Reflections with <i>I</i> > 2 $\sigma$ ( <i>I</i> )                                               | 14274                                                                                                                                  | 41005                                                                                                                                                           |
| <i>R</i> <sub>int</sub>                                                                           | 0.0436                                                                                                                                 | 0.0419                                                                                                                                                          |
| <i>F</i> (000)                                                                                    | 1497                                                                                                                                   | 2768                                                                                                                                                            |
| <i>R</i> <sub>1</sub> ( <i>R</i> [ <i>F</i> <sup>2</sup> > 2 $\sigma$ ( <i>F</i> <sup>2</sup> )]) | 0.0378                                                                                                                                 | 0.0337                                                                                                                                                          |
| w <i>R</i> <sub>2</sub> ( <i>F</i> <sup>2</sup> )                                                 | 0.0834                                                                                                                                 | 0.0860                                                                                                                                                          |
| GooF                                                                                              | 1.026                                                                                                                                  | 1.032                                                                                                                                                           |
| No. of Parameters                                                                                 | 496                                                                                                                                    | 1648                                                                                                                                                            |
| CCDC #                                                                                            | 2226462                                                                                                                                | 2226466                                                                                                                                                         |

**Table S4:** Crystallographic details of the compounds [1Cu][OTf] and [2Au][AuCl<sub>2</sub>].

| Compound                                                                                          | [1Cu][OTf]                                                                                                                                                   | [2Au][AuCl <sub>2</sub> ]                                                                                                                                                                                 |
|---------------------------------------------------------------------------------------------------|--------------------------------------------------------------------------------------------------------------------------------------------------------------|-----------------------------------------------------------------------------------------------------------------------------------------------------------------------------------------------------------|
| Chem. Formula                                                                                     | C <sub>58</sub> H <sub>58</sub> CuN <sub>8</sub> P <sub>2</sub> <sup>+</sup> ·CF <sub>3</sub> O <sub>3</sub> S <sup>-</sup> ·C <sub>4</sub> H <sub>8</sub> O | C <sub>58</sub> H <sub>76</sub> Au <sub>2</sub> N <sub>10</sub> P <sub>2</sub> <sup>+</sup> ·AuCl <sub>2</sub> <sup>-</sup> ·2.39(C <sub>4</sub> H <sub>8</sub> O)·0.61(CH <sub>2</sub> Cl <sub>2</sub> ) |
| Formula weight [g/mol]                                                                            | 1213.77                                                                                                                                                      | 1664.12                                                                                                                                                                                                   |
| Colour                                                                                            | orange                                                                                                                                                       | yellow                                                                                                                                                                                                    |
| Crystal system                                                                                    | monoclinic                                                                                                                                                   | monoclinic                                                                                                                                                                                                |
| Space group                                                                                       | <i>P2<sub>1</sub>/c</i>                                                                                                                                      | <i>P2<sub>1</sub>/c</i>                                                                                                                                                                                   |
| <i>a</i> [Å]                                                                                      | 19.9025(9)                                                                                                                                                   | 16.7640(8)                                                                                                                                                                                                |
| <i>b</i> [Å]                                                                                      | 19.0843(10)                                                                                                                                                  | 14.1706(7)                                                                                                                                                                                                |
| <i>c</i> [Å]                                                                                      | 15.6467(8)                                                                                                                                                   | 29.9119(13)                                                                                                                                                                                               |
| $\alpha$ [°]                                                                                      | 90                                                                                                                                                           | 90                                                                                                                                                                                                        |
| $\beta$ [°]                                                                                       | 102.216(2)                                                                                                                                                   | 100.9550(10)                                                                                                                                                                                              |
| $\gamma$ [°]                                                                                      | 90                                                                                                                                                           | 90                                                                                                                                                                                                        |
| <i>V</i> [Å <sup>3</sup> ]                                                                        | 5808.4(5)                                                                                                                                                    | 6976.3(6)                                                                                                                                                                                                 |
| <i>Z</i>                                                                                          | 4                                                                                                                                                            | 4                                                                                                                                                                                                         |
| $\rho_{\text{calcd.}}$ [g/cm <sup>3</sup> ]                                                       | 1.388                                                                                                                                                        | 1.584                                                                                                                                                                                                     |
| $\mu$ [mm <sup>-1</sup> ]                                                                         | 0.533                                                                                                                                                        | 4.422                                                                                                                                                                                                     |
| <i>T</i> [K]                                                                                      | 123(2)                                                                                                                                                       | 123(2)                                                                                                                                                                                                    |
| Measured reflections                                                                              | 131884                                                                                                                                                       | 118200                                                                                                                                                                                                    |
| Independent reflections                                                                           | 16923                                                                                                                                                        | 22231                                                                                                                                                                                                     |
| Reflections with <i>I</i> > 2 $\sigma$ ( <i>I</i> )                                               | 12204                                                                                                                                                        | 17962                                                                                                                                                                                                     |
| <i>R</i> <sub>int</sub>                                                                           | 0.1073                                                                                                                                                       | 0.0629                                                                                                                                                                                                    |
| <i>F</i> (000)                                                                                    | 2536                                                                                                                                                         | 3349                                                                                                                                                                                                      |
| <i>R</i> <sub>1</sub> ( <i>R</i> [ <i>F</i> <sup>2</sup> > 2 $\sigma$ ( <i>F</i> <sup>2</sup> )]) | 0.0451                                                                                                                                                       | 0.0406                                                                                                                                                                                                    |
| <i>wR</i> <sub>2</sub> ( <i>F</i> <sup>2</sup> )                                                  | 0.1164                                                                                                                                                       | 0.0849                                                                                                                                                                                                    |
| GooF                                                                                              | 1.011                                                                                                                                                        | 1.059                                                                                                                                                                                                     |
| No. of Parameters                                                                                 | 801                                                                                                                                                          | 893                                                                                                                                                                                                       |
| CCDC #                                                                                            | 2226464                                                                                                                                                      | 2226463                                                                                                                                                                                                   |

**Table S5:** Crystallographic details of the compounds **[2Ag·MeCN][OTf]** and **[2Cu·OTf]**.

| Compound                                                                                          | <b>[2Ag·MeCN][OTf]</b>                                                                                                                                  | <b>[2Cu·OTf]</b>                                                                                                                    |
|---------------------------------------------------------------------------------------------------|---------------------------------------------------------------------------------------------------------------------------------------------------------|-------------------------------------------------------------------------------------------------------------------------------------|
| Chem. Formula                                                                                     | C <sub>58</sub> H <sub>76</sub> AgN <sub>10</sub> P <sub>2</sub> ·CF <sub>3</sub> O <sub>3</sub> S <sup>-</sup> ·6.253(C <sub>2</sub> H <sub>3</sub> N) | C <sub>59</sub> H <sub>76</sub> CuF <sub>3</sub> N <sub>10</sub> O <sub>3</sub> P <sub>2</sub> S·2(C <sub>4</sub> H <sub>8</sub> O) |
| Formula weight [g/mol]                                                                            | 1488.89                                                                                                                                                 | 1332.04                                                                                                                             |
| Colour                                                                                            | colourless                                                                                                                                              | orange                                                                                                                              |
| Crystal system                                                                                    | monoclinic                                                                                                                                              | monoclinic                                                                                                                          |
| Space group                                                                                       | <i>P2<sub>1</sub>/c</i>                                                                                                                                 | <i>P2<sub>1</sub>/n</i>                                                                                                             |
| <i>a</i> [Å]                                                                                      | 15.7617(16)                                                                                                                                             | 15.1056(8)                                                                                                                          |
| <i>b</i> [Å]                                                                                      | 26.139(3)                                                                                                                                               | 21.1586(11)                                                                                                                         |
| <i>c</i> [Å]                                                                                      | 37.462(4)                                                                                                                                               | 21.5192(12)                                                                                                                         |
| $\alpha$ [°]                                                                                      | 90                                                                                                                                                      | 90                                                                                                                                  |
| $\beta$ [°]                                                                                       | 99.706(3)                                                                                                                                               | 105.733(2)                                                                                                                          |
| $\gamma$ [°]                                                                                      | 90                                                                                                                                                      | 90                                                                                                                                  |
| <i>V</i> [Å <sup>3</sup> ]                                                                        | 15213(3)                                                                                                                                                | 6620.1(6)                                                                                                                           |
| <i>Z</i>                                                                                          | 8                                                                                                                                                       | 4                                                                                                                                   |
| $\rho_{\text{calcd.}}$ [g/cm <sup>3</sup> ]                                                       | 1.300                                                                                                                                                   | 1.336                                                                                                                               |
| $\mu$ [mm <sup>-1</sup> ]                                                                         | 0.396                                                                                                                                                   | 0.476                                                                                                                               |
| <i>T</i> [K]                                                                                      | 123(2)                                                                                                                                                  | 123(2)                                                                                                                              |
| Measured reflections                                                                              | 581353                                                                                                                                                  | 229236                                                                                                                              |
| Independent reflections                                                                           | 29892                                                                                                                                                   | 19305                                                                                                                               |
| Reflections with <i>I</i> > 2 $\sigma$ ( <i>I</i> )                                               | 22294                                                                                                                                                   | 13818                                                                                                                               |
| <i>R</i> <sub>int</sub>                                                                           | 0.1135                                                                                                                                                  | 0.0965                                                                                                                              |
| <i>F</i> (000)                                                                                    | 6253                                                                                                                                                    | 2824                                                                                                                                |
| <i>R</i> <sub>1</sub> ( <i>R</i> [ <i>F</i> <sup>2</sup> > 2 $\sigma$ ( <i>F</i> <sup>2</sup> )]) | 0.0571                                                                                                                                                  | 0.0495                                                                                                                              |
| w <i>R</i> <sub>2</sub> ( <i>F</i> <sup>2</sup> )                                                 | 0.1526                                                                                                                                                  | 0.1313                                                                                                                              |
| GooF                                                                                              | 1.072                                                                                                                                                   | 1.012                                                                                                                               |
| No. of Parameters                                                                                 | 1882                                                                                                                                                    | 872                                                                                                                                 |
| CCDC #                                                                                            | 2226467                                                                                                                                                 | 2226465                                                                                                                             |



In the crystal, Pacman phosphane ligand **2** shows intermolecular interactions between the iminic nitrogen atoms N3 or N7, twisted outwards, and the pyrrolic hydrogen atoms H3 or H20 of other molecules of **2**, respectively (Figure S1). The interactions can be described by the parameters listed in Table S6.

In solution, no evidence of differently orientated iminic functions was observed. Only one signal for iminic protons is present in the  $^1\text{H}$  NMR spectrum (Figure S4). This indicates that the twisting is only favoured in solid state due to the intermolecular interactions or that in solution a rotation faster than NMR time scale occurs.

**Figure S1:** Intermolecular interactions of **2** in the crystal. Ellipsoids are drawn at 50% probability at 123(2) K. Solvent and disorder of one NiPr<sub>2</sub>-group are omitted for clarity. Symmetry codes: ('): 1-x, 1-y, 1-z, (''): 1-x, 1-y, z.

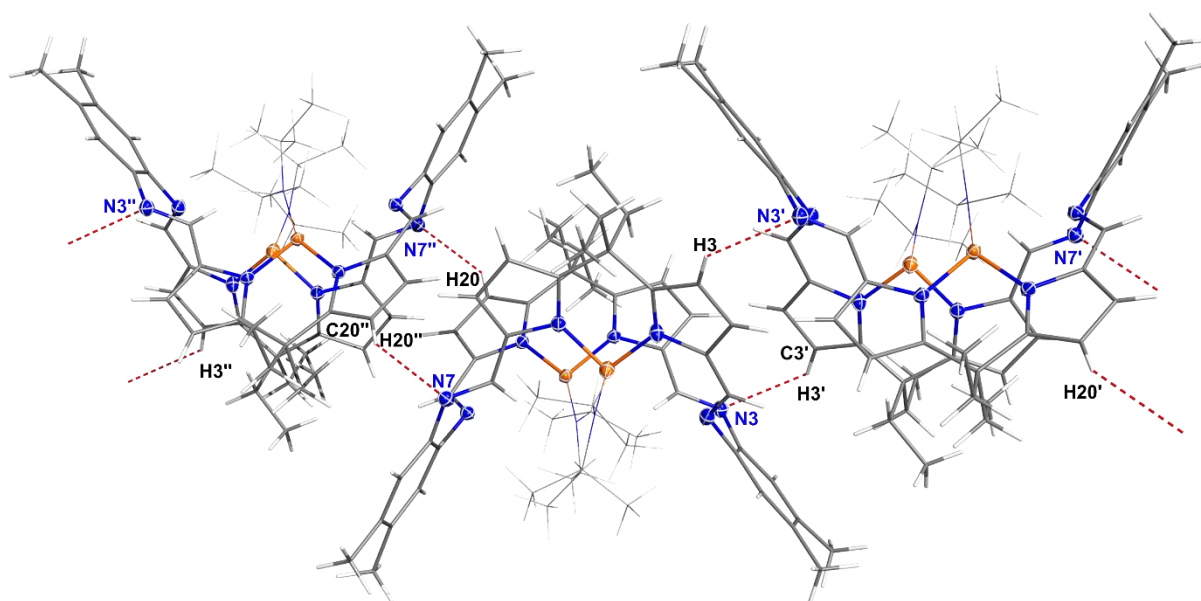

**Table S6.** Parameters of the intermolecular interactions of **2** (cf. Figure S1).

| Parameter                                     | N3, H3', C3' | N7, H20', C20'' |
|-----------------------------------------------|--------------|-----------------|
| $d(\text{H}\cdots\text{N})$ [Å]               | 2.605(3)     | 2.627(3)        |
| $d(\text{C}-\text{H}\cdots\text{N})$ [Å]      | 3.399(4)     | 3.304(5)        |
| $\alpha(\text{C}-\text{H}\cdots\text{N})$ [°] | 141.3(2)     | 128.6(3)        |

### 3 Syntheses of starting materials

#### 3.1 Dichloro-(diisopropylamino)-phosphine

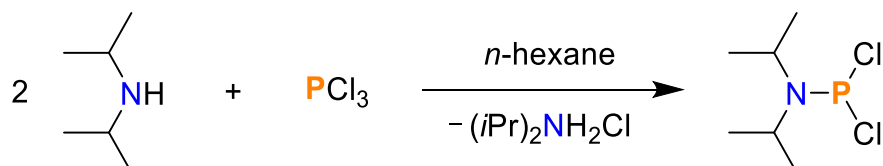

The synthesis is based on the procedure of R. I. PUGH.<sup>[6]</sup> A one litre flask equipped with an overhead stirrer, an overpressure valve and a dropping funnel is filled with a mixture of *n*-hexane (300 mL) and PCl<sub>3</sub> (36.68 g, 267.1 mmol). The dropping funnel is filled with (iPr)<sub>2</sub>NH (54.01 g, 533.7 mmol). The solution is cooled to 0 °C and the amine is added dropwise over a period of approximately 1 h. During this time, a colourless, voluminous precipitate is formed. The reaction solution is then heated to 40 °C and held at this temperature for 2 h. The solution is filtered off (pore 4) and the precipitate is washed three times via back-condensation of the solvent. The cloudy yellow extract is concentrated to a volume of approximately 60 mL and then filtered again (pore 4) giving a clear yellow liquid. The liquid is fractionally distilled at 0.66 mbar and an oil bath temperature of 85 °C. Bp: 62 °C. Yield: 35.06 g (173.5 mmol, 65.0%).

**Bp.** 62 °C (at 0.66 mbar). **<sup>31</sup>P{<sup>1</sup>H} NMR** (CD<sub>2</sub>Cl<sub>2</sub>, 202.5 MHz): δ = 169.3 ppm (s). **<sup>1</sup>H NMR** (CD<sub>2</sub>Cl<sub>2</sub>, 500.1 MHz): δ = 1.31 (d, <sup>3</sup>J(<sup>1</sup>H,<sup>1</sup>H) = 13.1 Hz, 12 H, CH<sub>3</sub>), 3.96 (s, 2 H, CH).

No complete analysis was carried out, as the compound is already known from the literature.

**Figure S2:** NMR spectra of dichloro-(diisopropylamino)-phosphine.

$^1\text{H}$  NMR spectrum  
 $\text{CD}_2\text{Cl}_2$ , 500.1 MHz

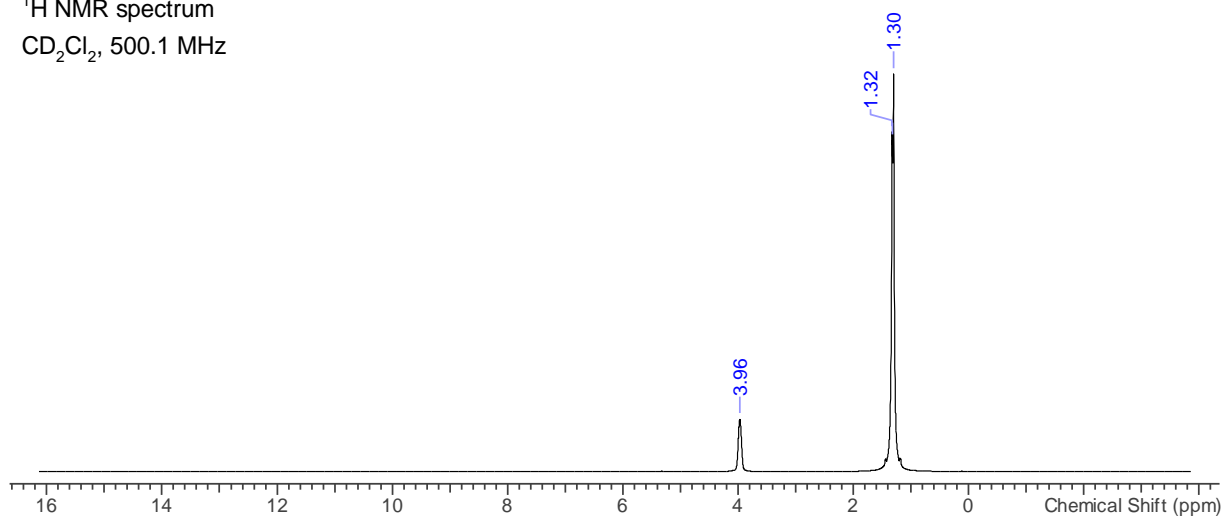

$^{31}\text{P}\{^1\text{H}\}$  NMR spectrum  
 $\text{CD}_2\text{Cl}_2$ , 202.5 MHz

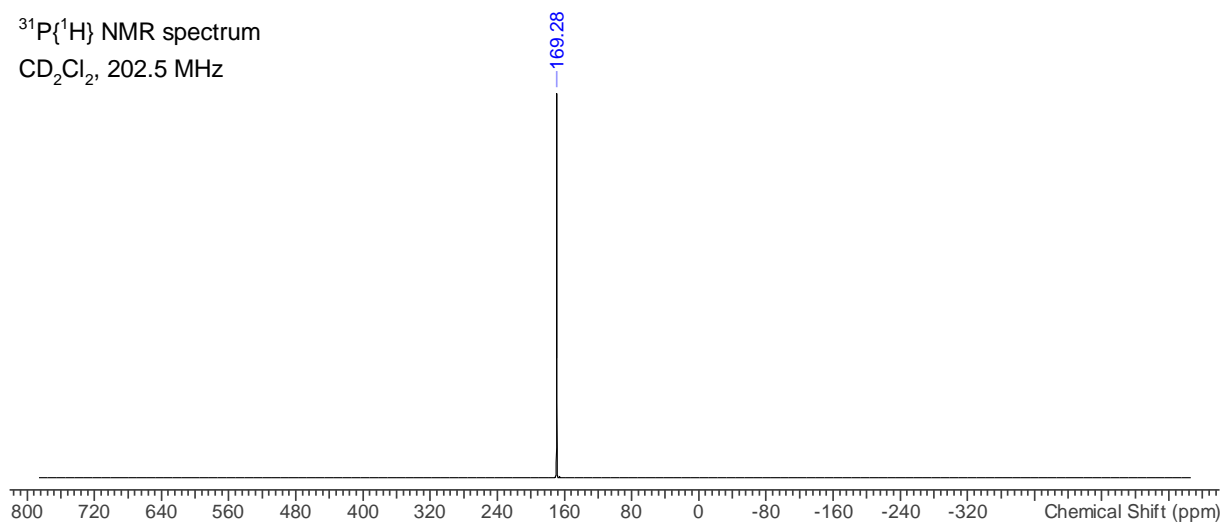

## 4 Syntheses of compounds

### 4.1 Pacman phosphane ligand 1

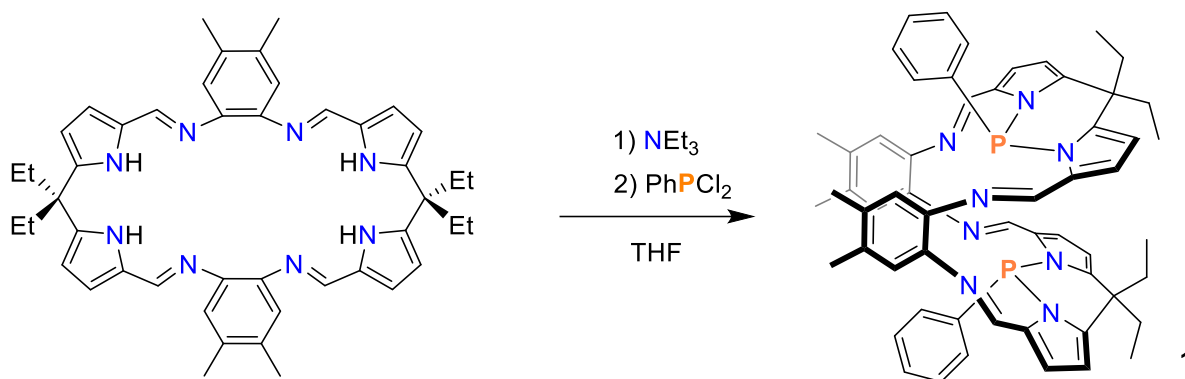

The yellow Pacman ligand (5.27 g, 7.07 mmol) is dissolved in THF (100 mL) giving a dark orange-red solution. Triethylamine (8.0 mL, 58 mmol) is added at ambient temperature leading to a colour change to bright orange. The reaction solution is cooled to  $-80\text{ }^\circ\text{C}$  and  $\text{PhPCl}_2$  (2.0 mL, 15 mmol) is added dropwise. The reaction solution turns to a dark red-brown colour. The solution is kept at  $-80\text{ }^\circ\text{C}$  for about 30 min and then slowly warmed up to ambient temperature overnight. During this time, a red precipitate is formed. The solvent is removed *in vacuo* ( $1 \times 10^{-3}$  mbar) and the residue is dried for about 30 min at  $50\text{ }^\circ\text{C}$ . The solids are suspended in  $\text{Et}_2\text{O}$  (20 mL) and dried for another 3 h *in vacuo* ( $1 \times 10^{-3}$  mbar) at  $50\text{ }^\circ\text{C}$ . Diethyl ether (150 mL) is added and the solution is degassed using the *freeze-pump-thaw* method. The raw product is extracted by sevenfold filtration and back-condensation of the diethyl ether. The extract is dried *in vacuo* ( $1 \times 10^{-3}$  mbar) for 1 h at  $50\text{ }^\circ\text{C}$ . In addition to the desired *exo-exo*-isomer, an undesired *endo-exo*-isomer is also formed. To separate the *exo-exo*-isomer from the *endo-exo*-isomer, the orange powder is dissolved in THF (100 mL). The solution is concentrated *in vacuo* ( $1 \times 10^{-3}$  mbar) and left to stand at  $5\text{ }^\circ\text{C}$  overnight for crystallization, resulting in the deposition of orange crystals of the *exo-exo*-isomer. The supernatant is removed via syringe at  $0\text{ }^\circ\text{C}$  and the orange crystals are washed at  $-80\text{ }^\circ\text{C}$  with THF ( $2 \times 5\text{ mL}$ ). The crystals are dried *in vacuo* ( $1 \times 10^{-3}$  mbar) for 5 h at  $50\text{ }^\circ\text{C}$ .

A second fraction can be isolated in the same manner. Approximately 1.35 equiv. of THF remain in the product. Yield: 2930 mg (2.85 mmol, 40.4%).

**Mp.** 284 °C (dec.). **EA** calc. (found) in %: C 74.16 (73.90), H 6.77 (6.60), N 10.88 (11.08). **<sup>31</sup>P{<sup>1</sup>H} NMR** (CD<sub>2</sub>Cl<sub>2</sub>, 202.5 MHz): δ = 68.1 ppm (s). **<sup>1</sup>H NMR** (CD<sub>2</sub>Cl<sub>2</sub>, 500.1 MHz): δ = 7.63 (s, 4 H, iminic CH), 7.14 - 7.19 (m, 2 H, phenyl *para*-CH), 7.00 - 7.06 (m, 4 H, phenyl *meta*-CH), 6.93 - 6.98 (m, 4 H, phenyl *ortho*-CH), 6.70 (d, <sup>3</sup>J(<sup>1</sup>H,<sup>1</sup>H) = 3.7 Hz, 4 H, pyrrolic CH), 6.26 (d, <sup>3</sup>J(<sup>1</sup>H,<sup>1</sup>H) = 3.7 Hz, 4 H, pyrrolic CH), 5.85 (s, 4 H, aromatic CH), 3.65 - 3.71 (m, 5.6 H, THF), 2.17 (q, <sup>3</sup>J(<sup>1</sup>H,<sup>1</sup>H) = 7.2 Hz, 4 H, *exo*-R-CH<sub>2</sub>-CH<sub>3</sub>), 2.11 (s, 12 H, Ar-CH<sub>3</sub>), 1.80 - 1.84 (m, 5.6 H, THF), 1.77 (q, <sup>3</sup>J(<sup>1</sup>H,<sup>1</sup>H) = 7.4 Hz, 4 H, *endo*-R-CH<sub>2</sub>-CH<sub>3</sub>), 1.02 (t, <sup>3</sup>J(<sup>1</sup>H,<sup>1</sup>H) = 7.2 Hz, 6 H, *exo*-R-CH<sub>2</sub>-CH<sub>3</sub>), 0.58 ppm (t, <sup>3</sup>J(<sup>1</sup>H,<sup>1</sup>H) = 7.2 Hz, 6 H, *endo*-R-CH<sub>2</sub>-CH<sub>3</sub>). **<sup>13</sup>C{<sup>1</sup>H} NMR** (CD<sub>2</sub>Cl<sub>2</sub>, 125.8 MHz): δ = 150.8 (s, iminic CH), 144.9 - 145.8 (m, phenyl *ipso*-C), 142.8 (s, pyrrolic C-C-Et), 142.4 (s, aromatic C), 134.6 (s, pyrrolic C), 133.3 (s, aromatic C-CH<sub>3</sub>), 132.6 (m, phenyl *ortho*-CH), 128.7 (s, phenyl *para*-CH phenyl), 127.0 (s, phenyl *meta*-CH), 122.6 (s, aromatic CH), 120.7 (s, pyrrolic CH near imine), 108.5 (s, pyrrolic CH near Et-groups), 68.3 (s, THF), 44.5 (s, C-Et<sub>2</sub>), 42.5 (s, *endo*-R-CH<sub>2</sub>-CH<sub>3</sub>), 32.1 (s, *exo*-R-CH<sub>2</sub>-CH<sub>3</sub>), 26.2 (s, THF), 19.3 (s, Ar-CH<sub>3</sub>), 10.3 (s, *exo*-R-CH<sub>2</sub>-CH<sub>3</sub>), 9.7 ppm (s, *endo*-R-CH<sub>2</sub>-CH<sub>3</sub>). **<sup>15</sup>N NMR** (CD<sub>2</sub>Cl<sub>2</sub>, 50.7 MHz): δ = -71.6 (s, iminic N), -216.3 ppm (d, <sup>1</sup>J(<sup>15</sup>N,<sup>31</sup>P) = 121 Hz, pyrrolic N). **IR** (ATR, 32 scans, cm<sup>-1</sup>):  $\tilde{\nu}$  = 2964 (m), 2929 (m), 2917 (m), 2871 (m), 1622 (vs), 1540 (w), 1472 (s), 1453 (m), 1435 (m), 1408 (m), 1375 (m), 1354 (m), 1321 (m), 1288 (m), 1255 (s), 1204 (w), 1179 (m), 1130 (w), 1084 (vs), 1035 (s), 993 (m), 956 (m), 913 (w), 882 (s), 857 (m), 827 (m), 763 (vs), 742 (s), 715 (w), 693 (s), 651 (m), 633 (w), 608 (w), 592 (w), 563 (m), 538 (m), 517 (m), 497 (s), 482 (s), 443 (s), 425 (vs). **Raman** (633 nm, 20 s, 20 scans, cm<sup>-1</sup>):  $\tilde{\nu}$  = 3120 (1), 3099 (1), 3051 (1), 2976 (1), 2936 (1), 2875 (1), 1909 (1), 1627 (10), 1593 (1), 1562 (3), 1491 (1), 1474 (2), 1394 (1), 1382 (1), 1325 (2), 1317 (1), 1277 (2), 1257 (2), 1182 (2), 1157 (1), 1097 (1), 1089 (1), 1035 (1), 1028 (1), 1002 (1), 997 (1), 959 (2), 928 (1), 914 (1), 887 (2), 874 (1), 865 (1), 850 (1), 822 (1), 739 (2), 690 (1), 619 (1), 598 (1), 532 (1), 520 (1), 516 (1), 509 (1), 484 (1), 473 (1), 454 (1), 415 (1), 398 (1), 375 (1), 358 (1), 348 (1), 326 (1), 312 (1),

296 (1), 284 (1), 236 (1), 135 (2), 98 (2). **MS** (APCI pos, THF, m/z): 929 [M+H]<sup>+</sup>, 930 [M+H]<sup>+</sup>, 946 [M+H<sub>2</sub>O]<sup>+</sup>.

Suitable crystals for single crystal X-ray crystallography were received as described above.

**Figure S3:** NMR, IR and Raman spectra of **1** (solvent signals indicated by asterisks).

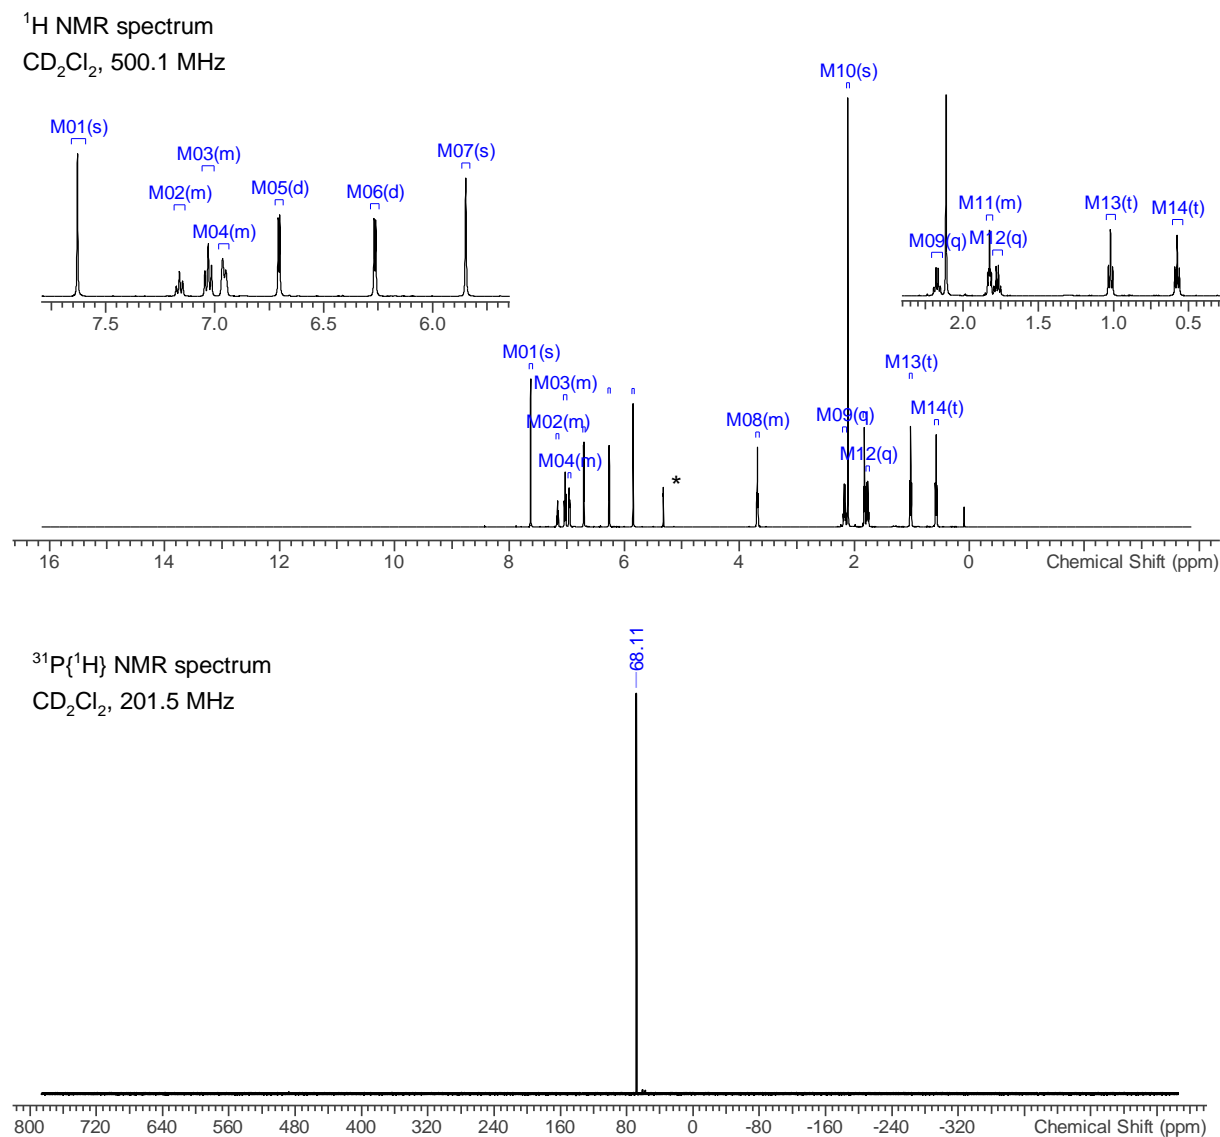

Figure S3 continued.

$^{13}\text{C}\{^1\text{H}\}$  NMR spectrum

$\text{CD}_2\text{Cl}_2$ , 125.8 MHz

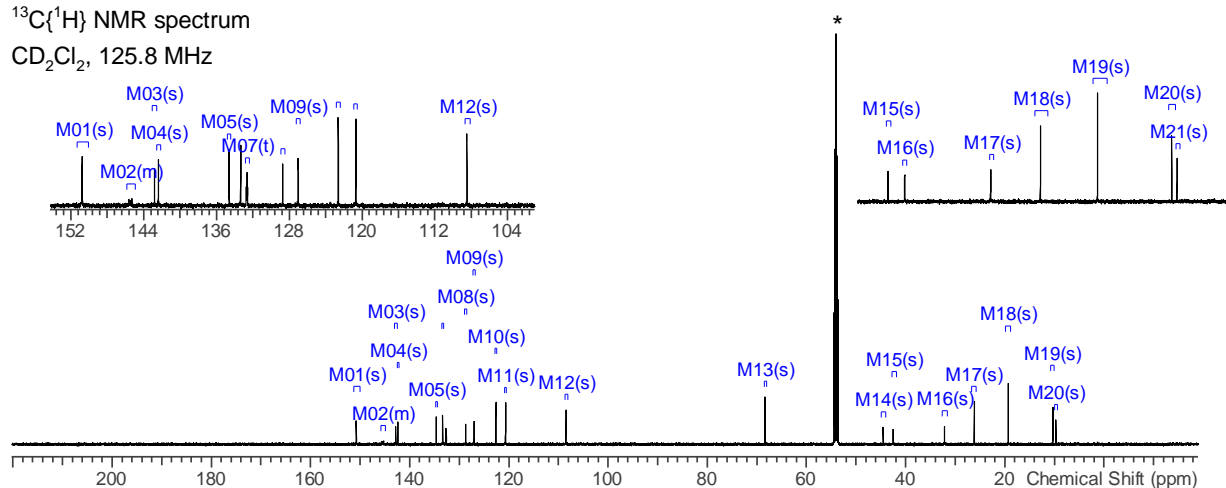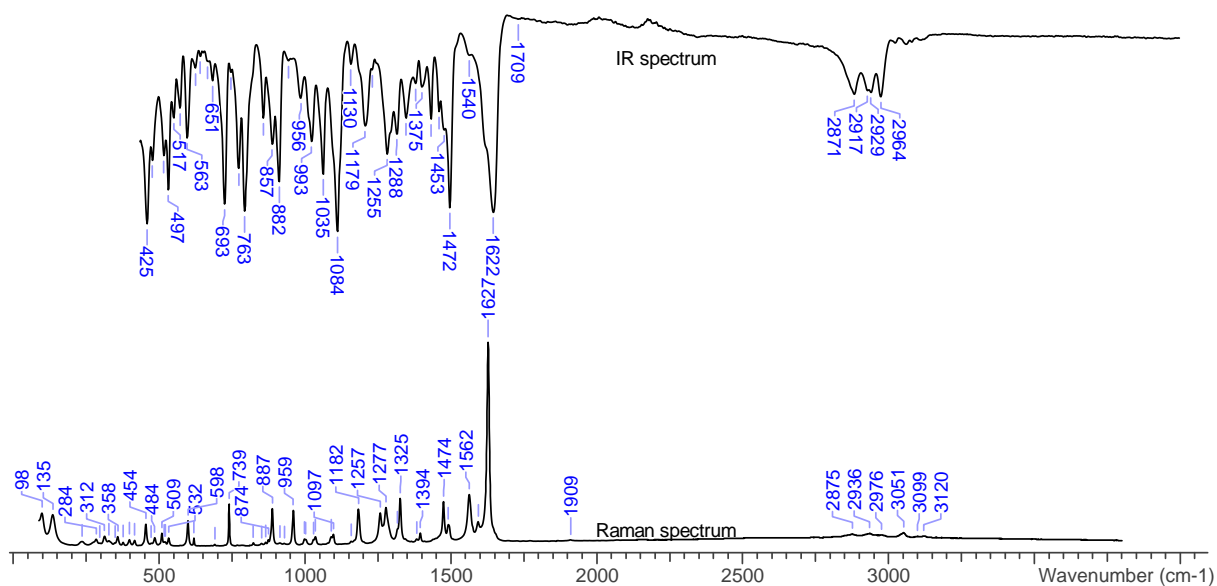

## 4.2 Pacman phosphane ligand 2

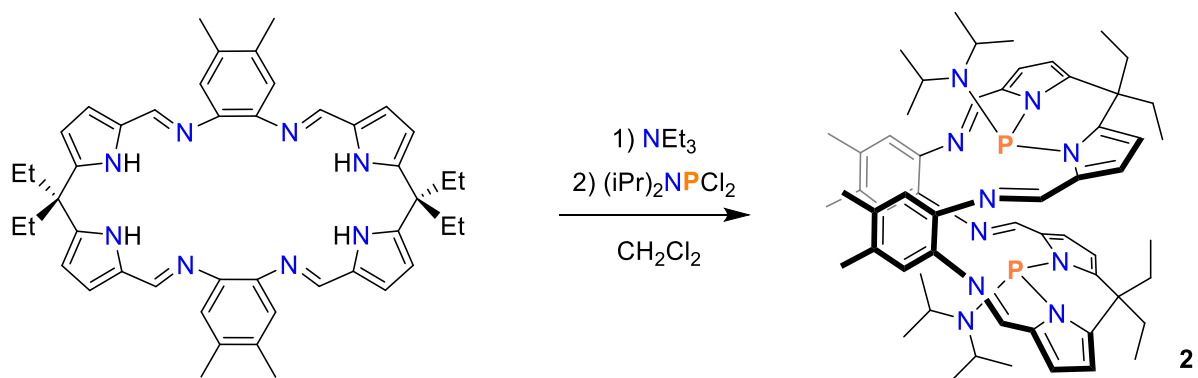

The yellow Pacman ligand (5.2 g, 7.3 mmol) is dissolved in dichloromethane (150 mL) giving a dark orange-red solution. Triethylamine (8.0 mL, 58 mmol) is added at ambient temperature leading to a colour change to bright orange. The reaction solution is cooled to  $-80\text{ }^{\circ}\text{C}$  and  $(i\text{Pr})_2\text{NPCl}_2$  (2.7 mL, 15 mmol) is added dropwise. It should be noted that the phosphane freezes very easily. Therefore, the cannula of the syringe should not be inserted too far into the cooled flask, to prevent the phosphane from clogging the syringe. The reaction solution turns to a dark red-brown colour. The solution is kept at  $-80\text{ }^{\circ}\text{C}$  for about 30 min and then slowly warmed up to ambient temperature overnight. All volatiles are removed *in vacuo* ( $1\times 10^{-3}$  mbar) and the residue is dried for about 30 min at  $50\text{ }^{\circ}\text{C}$ . The yellow-brown solids are suspended in  $\text{Et}_2\text{O}$  (20 mL) and dried for another 3.5 h *in vacuo* ( $1\times 10^{-3}$  mbar) at  $50\text{ }^{\circ}\text{C}$ . The solids are transferred into a Soxhlet apparatus and a Schlenk flask is filled with  $\text{Et}_2\text{O}$  (150 mL). The flask is connected to the Soxhlet apparatus and the ether is heated to boiling via an oil bath. The solids are extracted for approximately 12 d. The extract is then dried *in vacuo* ( $1\times 10^{-3}$  mbar) for 2 h at  $50\text{ }^{\circ}\text{C}$ , yielding orange-brown solids. In addition to the desired *exo-exo*-isomer, an undesired *endo-exo*-isomer is also formed. To separate the *exo-exo*-isomer from the *endo-exo*-isomer, THF (100 mL) is added to wash the crude product. The dark red-brown solution containing the *endo-exo*-isomer is filtered off (pore 4) and the yellow residue containing the *exo-exo*-isomer is washed again with THF (10 mL). The solids are then dried *in vacuo* ( $1\times 10^{-3}$  mbar) at  $50\text{ }^{\circ}\text{C}$  for 2 h. The filtrate can be discarded. Yield: 3950 mg (4.05 mmol, 55.5%).

**Mp.**  $310\text{ }^{\circ}\text{C}$  (dec.). **EA** calc. (found) in %: C 71.43 (71.14), H 7.86 (7.60), N 14.36 (14.41).  **$^{31}\text{P}\{^1\text{H}\}$ -NMR** ( $\text{CD}_2\text{Cl}_2$ , 121.5 MHz):  $\delta = 83.2$  ppm (s).  **$^1\text{H}$  NMR** ( $\text{CD}_2\text{Cl}_2$ , 500.1 MHz):  $\delta = 8.86$  (s, 4 H, iminic CH), 6.91 (d,  $^3J(^1\text{H},^1\text{H}) = 3.7$  Hz, 4 H, pyrrolic CH), 6.73 (s, 4 H, aromatic CH), 6.20 (d,  $^3J(^1\text{H},^1\text{H}) = 3.7$  Hz, 4 H, pyrrolic CH), 3.10 - 3.27 (m, 4 H, *iPr*-groups CH), 2.23 (s, 12 H, Ar- $\text{CH}_3$ ), 2.20 (q,  $^3J(^1\text{H},^1\text{H}) = 7.3$  Hz, 4 H, R- $\text{CH}_2$ - $\text{CH}_3$ ), 1.49 (q,  $^3J(^1\text{H},^1\text{H}) = 7.4$  Hz, 4 H, R- $\text{CH}_2$ - $\text{CH}_3$ ), 0.91 (t,  $^3J(^1\text{H},^1\text{H}) = 7.2$  Hz, 6 H, R- $\text{CH}_2$ - $\text{CH}_3$ ), 0.85 (br d,  $^3J(^1\text{H},^1\text{H}) = 6.3$  Hz, 24 H, *iPr*-groups  $\text{CH}_3$ ), 0.15 ppm (t,  $^3J(^1\text{H},^1\text{H}) = 7.3$  Hz, 6 H, R- $\text{CH}_2$ -



$CH_3$ ).  **$^{13}C\{^1H\}$ -NMR** ( $CD_2Cl_2$ , 125.8 MHz):  $\delta$  = 153.3 (m, iminic CH), 142.8 (s, pyrrolic C-C-Et), 142.5 (s, aromatic C), 135.8 (m, pyrrolic C), 133.6 (s, aromatic C- $CH_3$ ), 123.6 (s, aromatic CH), 119.8 (s, pyrrolic CH near imine), 108.2 (s, pyrrolic CH near ethyl), 47.9 - 48.4 (m, *iPr*-groups CH), 46.2 (s, R- $CH_2$ - $CH_3$ ), 45.0 (s, C-Et<sub>2</sub>), 32.8 (s, R- $CH_2$ - $CH_3$ ), 23.8 (br s, *iPr*-groups  $CH_3$ ), 19.5 (s, aromatic  $CH_3$ ), 9.8 (s, R- $CH_2$ - $CH_3$ ), 9.4 ppm (s, R- $CH_2$ - $CH_3$ ).  **$^{15}N$ -NMR** ( $CD_2Cl_2$ , 50.7 MHz):  $\delta$  = -76.7 (s, iminic N), -215.9 (d,  $^1J(^{15}N, ^{31}P)$  = 142 Hz, pyrrolic N), -284.0 ppm (m, *iPr*-groups N). **IR** (ATR, 32 scans,  $cm^{-1}$ ):  $\tilde{\nu}$  = 2966 (m), 2925 (w), 2873 (w), 1622 (m), 1608 (s), 1544 (w), 1472 (s), 1402 (w), 1373 (m), 1340 (m), 1336 (m), 1299 (m), 1266 (m), 1243 (m), 1191 (m), 1175 (m), 1140 (w), 1123 (w), 1088 (s), 1024 (m), 979 (s), 952 (m), 880 (m), 855 (m), 818 (m), 791 (m), 771 (vs), 738 (w), 730 (m), 719 (w), 701 (m), 676 (m), 655 (w), 631 (m), 620 (m), 606 (w), 587 (w), 567 (m), 542 (m), 532 (m), 515 (s), 460 (m), 451 (m), 435 (s). **Raman** (784 nm, 20 s, 20 scans,  $cm^{-1}$ ):  $\tilde{\nu}$  = 1624 (8), 1607 (10), 1589 (7), 1550 (3), 1489 (4), 1474 (7), 1405 (3), 1382 (5), 1357 (2), 1335 (4), 1298 (4), 1258 (7), 1243 (5), 1203 (1), 1192 (1), 1177 (8), 1096 (2), 1077 (2), 1036 (3), 1024 (1), 976 (1), 963 (9), 951 (1), 890 (2), 882 (3), 873 (1), 865 (1), 852 (1), 816 (5), 796 (1), 782 (1), 740 (5), 731 (4), 707 (2), 677 (1), 649 (2), 631 (1), 621 (2), 587 (1), 558 (1), 541 (3), 526 (2), 517 (1), 494 (2), 479 (1), 462 (1), 440 (2), 432 (2), 408 (1), 384 (2), 372 (2), 350 (4), 331 (3), 286 (6), **MS** (APCI pos, THF, m/z): 975  $[M+H]^+$ , 976  $[M+H]^+$ , 977  $[M+H]^+$ .

To obtain suitable crystals for single crystal X-ray crystallography, **2** is dissolved in dichloromethane. The solution is reduced *in vacuo* ( $1 \times 10^{-3}$  mbar) until a yellow precipitate is formed. The precipitate is redissolved in heat and slowly cooled in a warm water bath for crystallisation.

**Figure S4:** NMR, IR and Raman spectra of **2** (solvent signals indicated by asterisks).

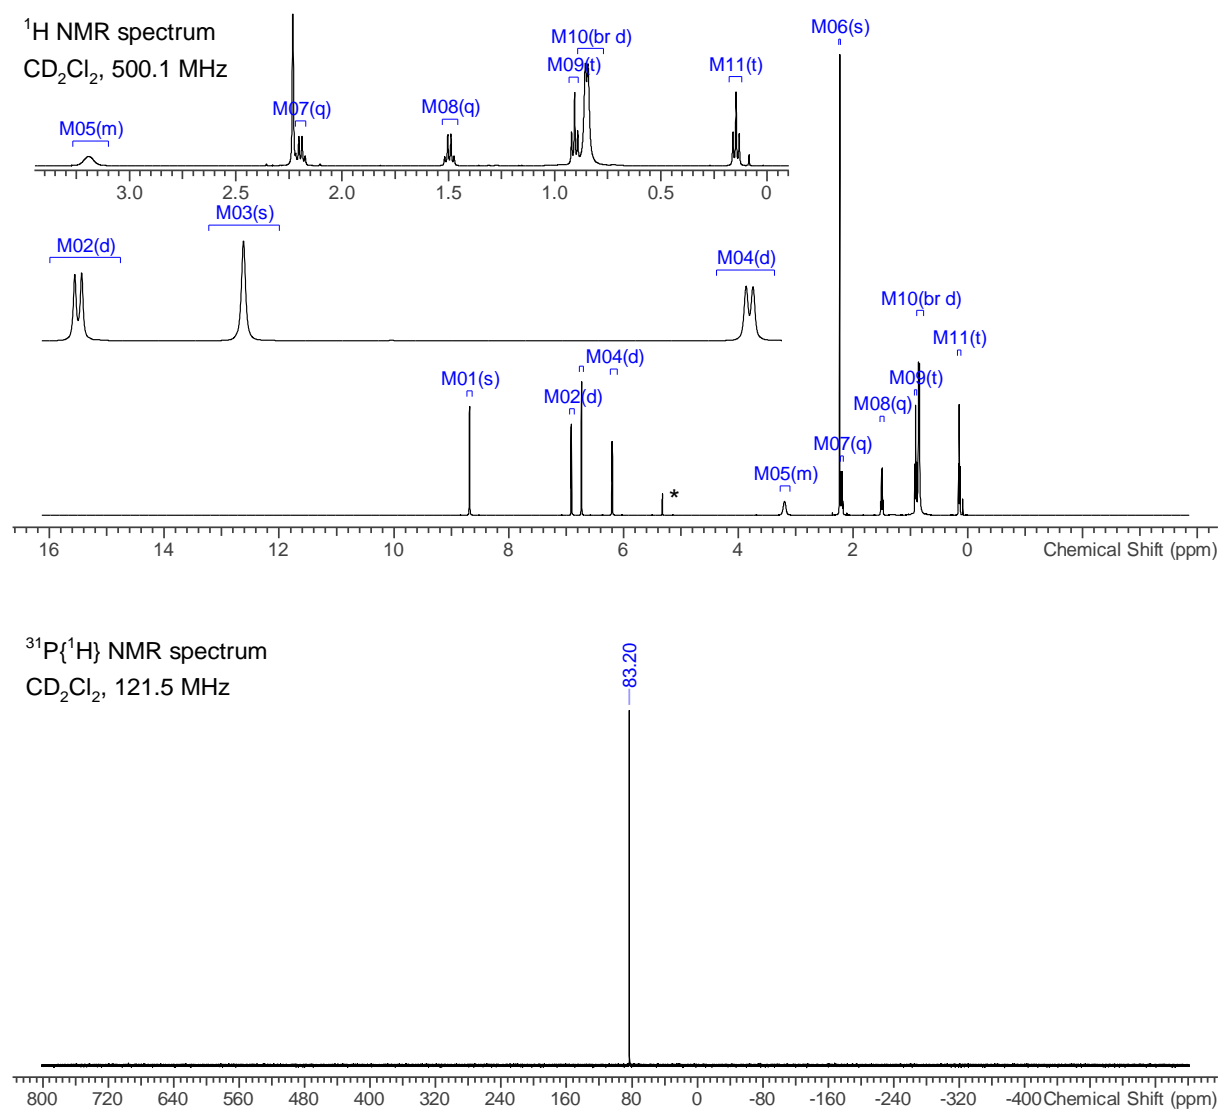

Figure S4 continued.

$^{13}\text{C}\{^1\text{H}\}$  NMR spectrum  
 $\text{CD}_2\text{Cl}_2$ , 125.8 MHz

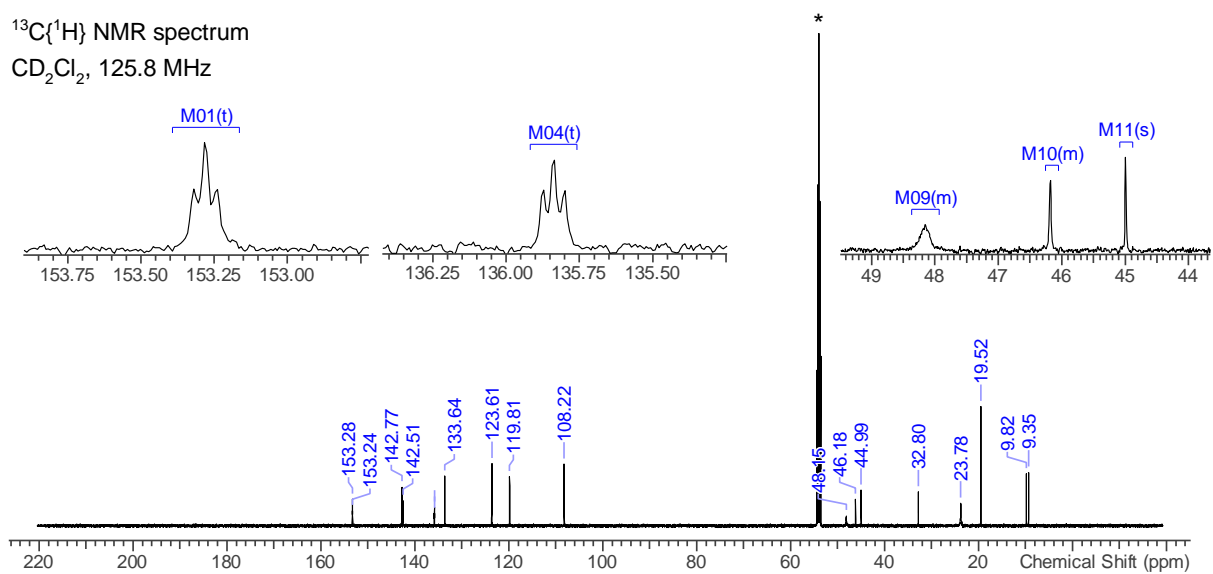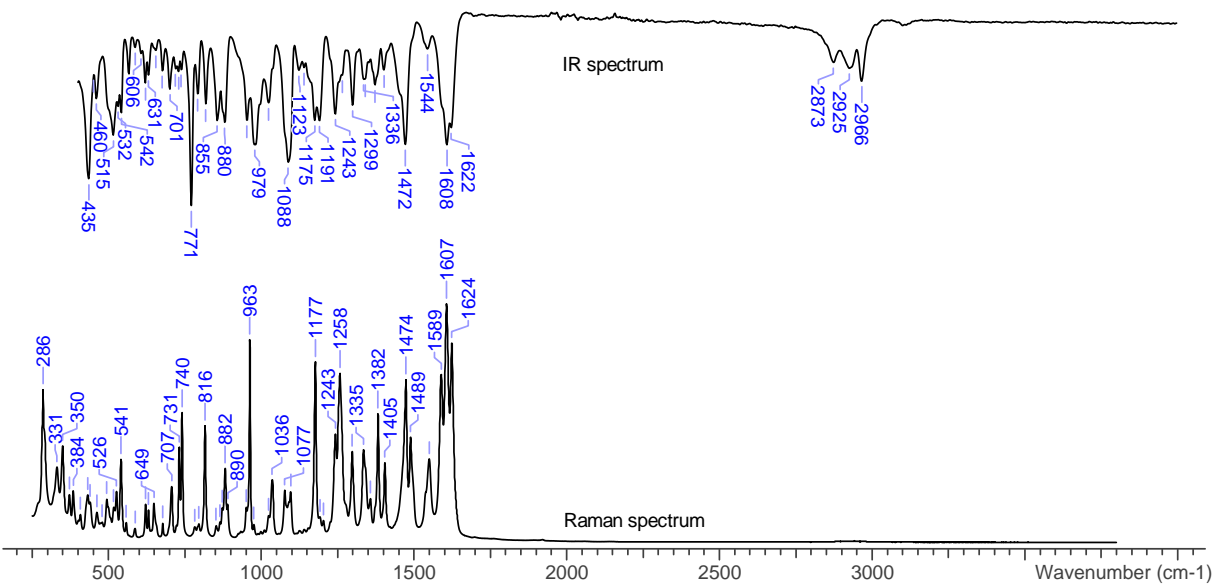

### 4.3 Pacman phosphane gold(I) complex [1Au][Cl]

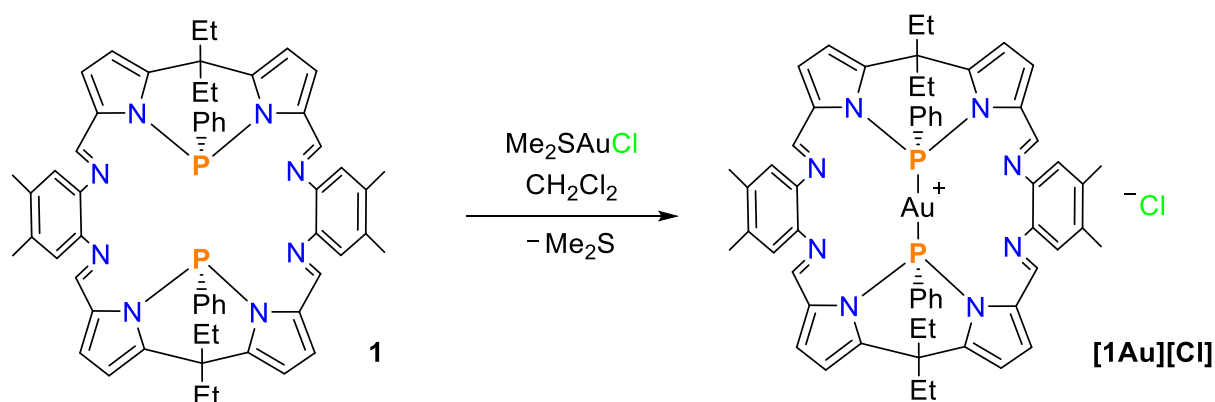

A 25 mL Schlenk flask is filled with **1** (207 mg, 0.20 mmol) and colourless  $\text{Me}_2\text{SAuCl}$  (59.0 mg, 0.20 mmol). The solids are dissolved in dichloromethane (12 mL) giving an orange solution. The reaction mixture is stirred overnight. The solution is concentrated *in vacuo* ( $1 \times 10^{-3}$  mbar) and left to stand at 5 °C overnight for crystallization, resulting in the deposition of yellow crystals. The supernatant is removed via a syringe and the yellow crystals are washed at  $-80$  °C with dichloromethane (0.5 mL). The crystals are dried *in vacuo* ( $1 \times 10^{-3}$  mbar) for 2 h at 50 °C. A second fraction can be isolated in the same manner. Yield: 205 mg (0.18 mmol, 88.0%).

**Mp.** 225 °C (dec.); **EA** calc. (found) in %: C 59.98 (59.14), H 5.03 (4.97), N 9.65 (9.51);  **$^{31}\text{P}\{^1\text{H}\}$  NMR** ( $\text{CD}_2\text{Cl}_2$ , 202.5 MHz):  $\delta = 85.5$  ppm (s);  **$^1\text{H}$  NMR** ( $\text{CD}_2\text{Cl}_2$ , 500.13 MHz):  $\delta = 7.67$  (s, 4 H, iminic CH), 7.44 (t,  $^3J(^1\text{H},^1\text{H}) = 7.5$  Hz, 2 H, phenyl *para*-CH), 7.20 (m, 4 H, phenyl *meta*-CH), 7.00 (q,  $J = 7.0$  Hz, 4 H, phenyl *ortho*-CH), 6.92 (d,  $^3J(^1\text{H},^1\text{H}) = 3.8$  Hz, 4 H, pyrrolic CH near imine), 6.48 (d,  $^3J(^1\text{H},^1\text{H}) = 3.8$  Hz, 4 H, pyrrolic CH near Et-groups), 5.82 (s, 4 H, aromatic CH), 2.36 (q,  $^3J(^1\text{H},^1\text{H}) = 7.2$  Hz, 4H, *exo*-R-CH<sub>2</sub>-CH<sub>3</sub>), 2.14 (s, 12 H, Ar-CH<sub>3</sub>), 1.89 (q,  $^3J(^1\text{H},^1\text{H}) = 7.5$  Hz, 4 H, *endo*-R-CH<sub>2</sub>-CH<sub>3</sub>), 1.09 (t,  $^3J(^1\text{H},^1\text{H}) = 7.2$  Hz, 6 H, *exo*-R-CH<sub>2</sub>-CH<sub>3</sub>), 0.69 ppm (t,  $^3J(^1\text{H},^1\text{H}) = 7.5$  Hz, 6 H, *endo*-R-CH<sub>2</sub>-CH<sub>3</sub>);  **$^{13}\text{C}\{^1\text{H}\}$  NMR** ( $\text{CD}_2\text{Cl}_2$ , 125.76 MHz):  $\delta = 149.8$  (s, iminic CH), 144.3 (s, pyrrolic C-C-Et), 140.3 (s, aromatic C), 137.6 (t,  $J(^{13}\text{C},^{31}\text{P}) = 39$  Hz, phenyl *ipso*-C), 135.3 (s, aromatic C-CH<sub>3</sub>), 134.8

(s, pyrrolic C), 132.6 (t,  $J(^{13}\text{C},^{31}\text{P}) = 8$  Hz, phenyl *ortho*-CH), 132.2 (s, phenyl *para*-CH), 128.4 (t,  $J(^{13}\text{C},^{31}\text{P}) = 6$  Hz, phenyl *meta*-CH), 124.2 (s, pyrrolic CH near imine), 122.2 (s, aromatic CH), 110.9 (s, pyrrolic CH near Et-groups), 45.1 (s, C-Et<sub>2</sub>), 44.4 (s, *endo*-CH<sub>2</sub>-CH<sub>3</sub>), 31.5 (s, *exo*-CH<sub>2</sub>-CH<sub>3</sub>), 19.4 (s, Ar-CH<sub>3</sub>), 10.4 (s, *endo*-CH<sub>2</sub>-CH<sub>3</sub>), 10.2 ppm (s *exo*-CH<sub>2</sub>-CH<sub>3</sub>); **<sup>15</sup>N NMR** (50.68 MHz, CD<sub>2</sub>Cl<sub>2</sub>):  $\delta = -67.5$  (s, iminic N),  $-231.3$  ppm (s, pyrrolic N); **IR** (ATR, 32 scans, cm<sup>-1</sup>):  $\tilde{\nu} = 3059$  (w), 3011 (w), 2962 (m), 2931 (m), 2919 (m), 2869 (m), 1624 (s), 1505 (w), 1476 (s), 1453 (m), 1437 (m), 1402 (m), 1377 (m), 1352 (m), 1317 (m), 1280 (m), 1253 (s), 1183 (m), 1134 (m), 1094 (s), 1035 (m), 993 (m), 975 (m), 882 (s), 862 (m), 824 (m), 783 (s), 767 (s), 738 (m), 703 (m), 690 (s), 645 (m), 637 (m), 596 (m), 571 (s), 544 (m), 536 (s), 505 (s), 472(vs), 443 (s), 420 (s); **Raman** (633 nm, 10 s, 20 scans, cm<sup>-1</sup>):  $\tilde{\nu} = 3118$  (1), 3056 (1), 3031 (1), 2978 (1), 2942 (1), 2917 (1), 2883 (1), 1624 (10), 1591 (2), 1562 (3), 1497 (2), 1475 (3), 1433 (1), 1391 (1), 1373 (1), 1340 (1), 1319 (3), 1276 (1), 1255 (4), 1180 (3), 1115 (1), 1098 (1), 1078 (1), 1037 (1), 1026 (1), 997 (2), 962 (2), 954 (2), 926 (1), 881 (2), 869 (1), 862 (1), 819 (1), 738 (3), 706 (1), 695 (1), 666 (1), 620 (3), 547 (1), 527 (1), 517 (1), 503 (1), 480 (2), 454 (1), 415 (1), 399 (1), 376 (1), 368 (1), 360 (1), 339 (1), 313 (1), 296 (1), 286 (1), 230 (1), 132 (4), 76 (4); **MS** (ESI, m/z, THF): 1125.1 [M-Cl]<sup>+</sup>.

Suitable crystals for single crystal X-ray crystallography were received as described above.

**Figure S5:** NMR, IR and Raman spectra of **[1Au][Cl]** (solvent signals indicated by asterisks).

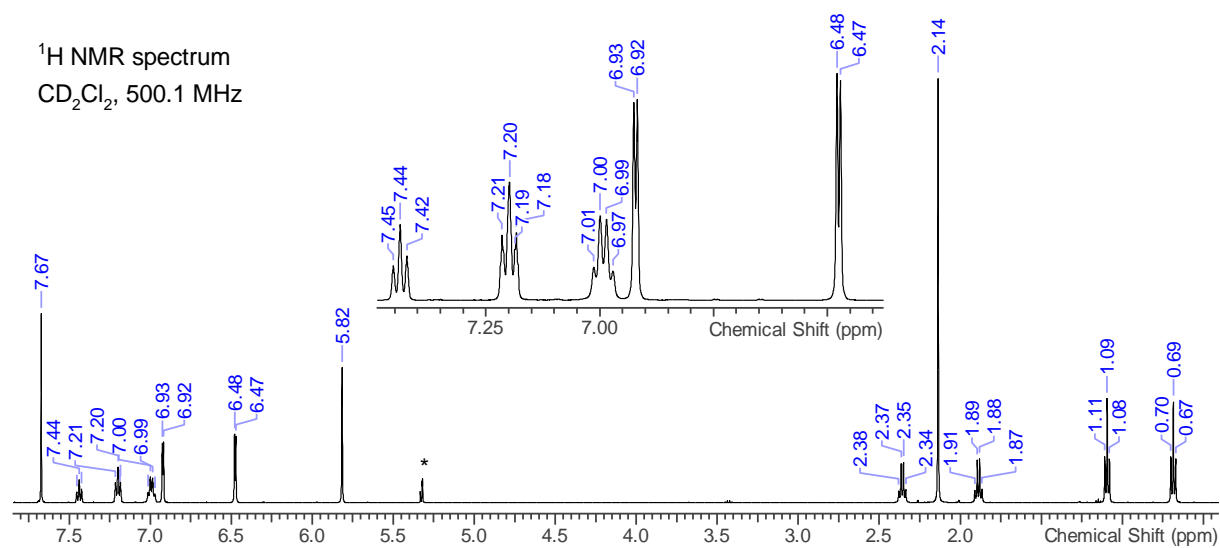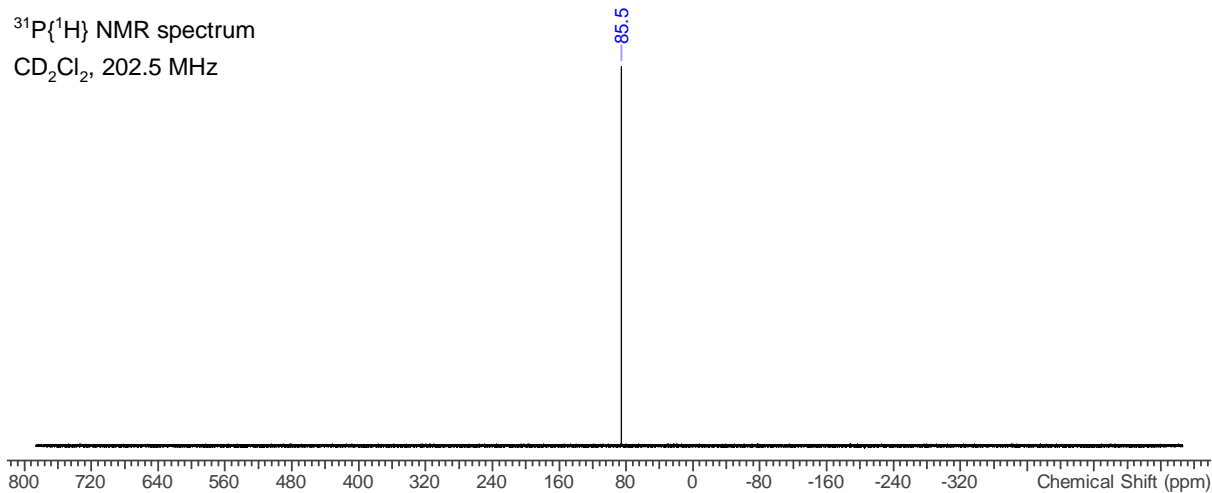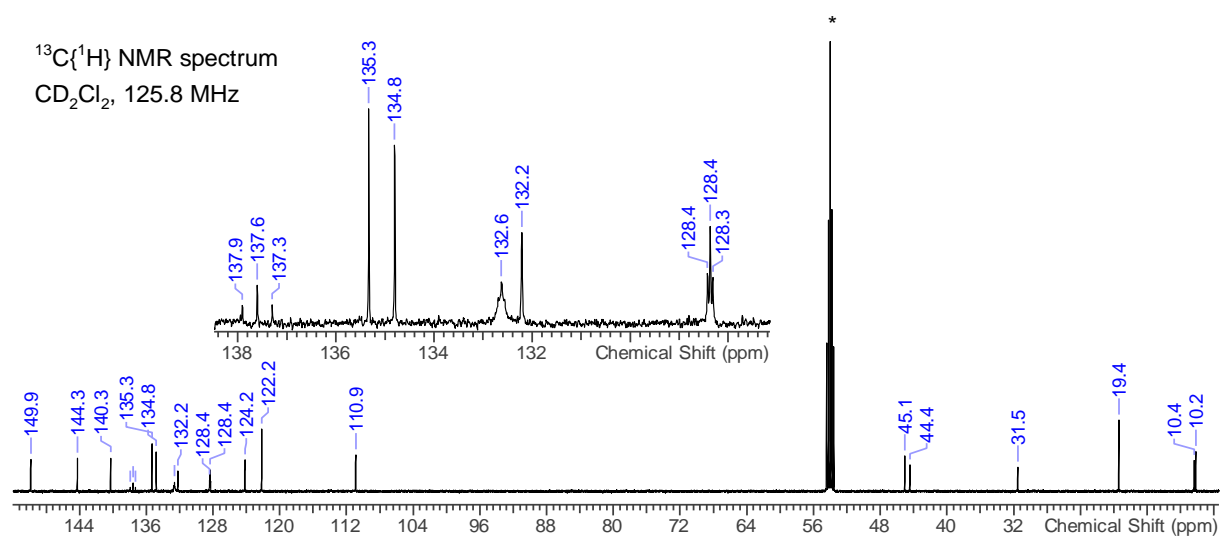

Figure S5 continued.

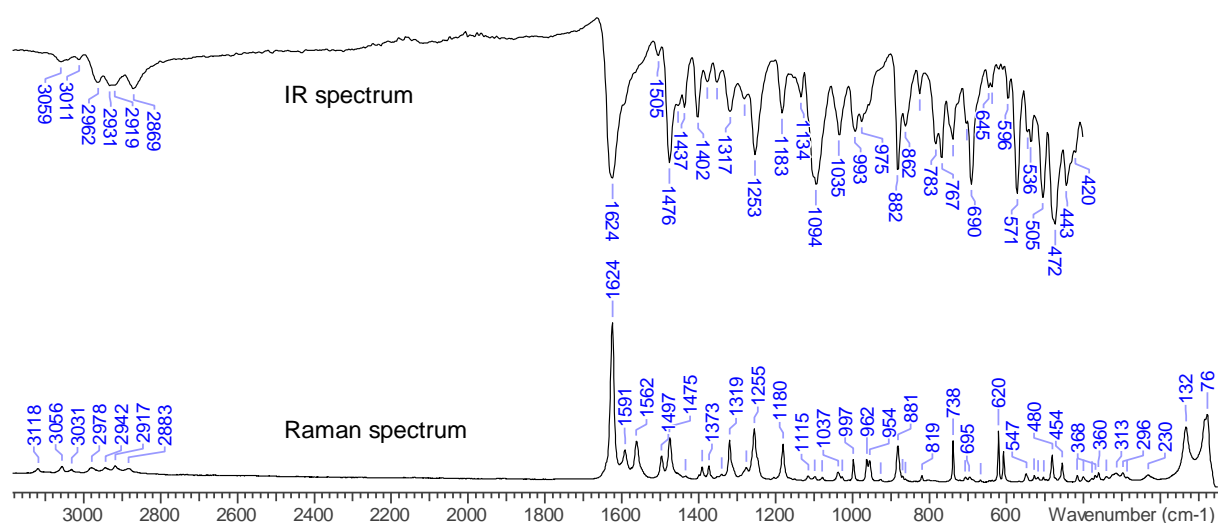

#### 4.4 Pacman phosphane silver(I) complex [1Ag][OTf]

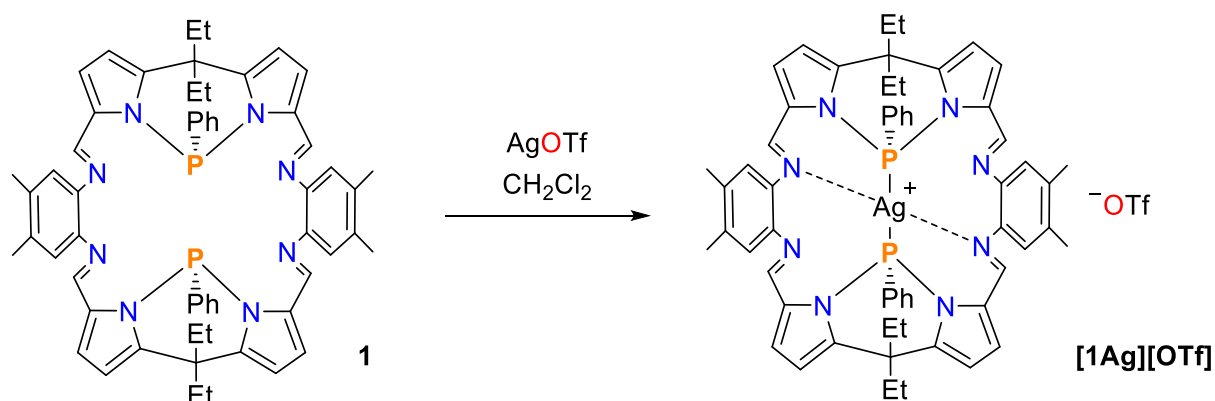

The reaction is carried out in the absence of light, as the AgOTf is light sensitive. A 25 mL Schlenk flask is filled with **1** (236 mg, 0.23 mmol) and colorless AgOTf (57.0 mg, 0.22 mmol). The solids are dissolved in dichloromethane (15 mL) giving a yellow solution. The reaction mixture is stirred for about 1 h during which the solution turns bright orange. THF (4 mL) is added to the solution, which is then concentrated *in vacuo* ( $1 \times 10^{-3}$  mbar). The concentrated solution is left to stand in a water bath in the fridge at 5 °C overnight for crystallization, resulting in the deposition of colourless crystals. The crystals are too small to be measured by X-ray structure analysis. The crystals are therefore isolated by removing the supernatant via a syringe. The removed solution is treated as a second fraction analogous to the first. The isolated crystals of the first

fraction are washed with THF (2 mL) at  $-80\text{ }^{\circ}\text{C}$ . The light yellow crystals are dried *in vacuo* ( $1 \times 10^{-3}$  mbar) for 1 h at  $50\text{ }^{\circ}\text{C}$  and redissolved in THF (12 mL). The solution is then concentrated *in vacuo* ( $1 \times 10^{-3}$  mbar) and left to stand in a warm water bath for crystallization. Suitable crystals for X-ray structure analysis can be obtained this way. Approximately 0.6 equiv. of THF remain in the product. Yield 216 mg (0.18 mmol, 80%).

**Mp.**  $293\text{ }^{\circ}\text{C}$  (dec.); **EA** calc. (incl. 0.6 equiv. THF) (found) in %: C 60.06 (60.00), H 5.32 (5.02), N 8.95 (9.50), S 2.56 (2.71);  **$^{31}\text{P}\{^1\text{H}\}$  NMR** ( $\text{CD}_2\text{Cl}_2$ , 121.49 MHz):  $\delta = 60.9$  (d,  $^1J(^{31}\text{P}, ^{107}\text{Ag}) = 707$  Hz, 2 P), 60.9 ppm (d,  $^1J(^{31}\text{P}, ^{109}\text{Ag}) = 822$  Hz, 2 P);  **$^1\text{H}$  NMR** ( $\text{CD}_2\text{Cl}_2$ , 300.13 MHz):  $\delta = 7.70$  (m, 4 H, iminic CH), 7.43 (m, 2 H, phenyl *para*-CH), 7.22 (m, 4 H, phenyl *meta*-CH), 6.98 (m, 4 H, phenyl *ortho*-CH), 6.95 (d,  $^3J(^1\text{H}, ^1\text{H}) = 3.8$  Hz, 4 H, pyrrolic CH near imine), 6.48 (d,  $^3J(^1\text{H}, ^1\text{H}) = 3.8$  Hz, 4 H, pyrrolic CH near Et-groups), 5.91 (s, 4 H, aromatic CH), 3.68 (m, 2.5 H, THF), 2.39 (q,  $^3J(^1\text{H}, ^1\text{H}) = 7.2$  Hz, 4 H, *exo*-R- $\text{CH}_2\text{-CH}_3$ ), 2.15 (s, 12 H, Ar- $\text{CH}_3$ ), 1.89 (q,  $^3J(^1\text{H}, ^1\text{H}) = 7.6$  Hz, 4 H, *endo*-R- $\text{CH}_2\text{-CH}_3$ ), 1.82 (m, 2.5 H, THF), 1.10 (t,  $^3J(^1\text{H}, ^1\text{H}) = 7.2$  Hz, 6 H, *exo*-R- $\text{CH}_2\text{-CH}_3$ ), 0.63 ppm (t,  $^3J(^1\text{H}, ^1\text{H}) = 7.6$  Hz, 6H, *endo*-R- $\text{CH}_2\text{-CH}_3$ );  **$^{13}\text{C}\{^1\text{H}\}$  NMR** ( $\text{CD}_2\text{Cl}_2$ , 125.76 MHz):  $\delta = 152.2$  (t,  $J = 3$  Hz, iminic CH), 144.0 (s, pyrrolic C-C-Et), 140.7 (s, aromatic C), 137.9 (m, phenyl *ipso*-C), 135.8 (s, aromatic C- $\text{CH}_3$ ), 133.8 (s, pyrrolic C), 132.0 (s, phenyl *para*-CH), 131.9 (d,  $J = 9$  Hz, phenyl *ortho*-CH), 128.6 (t,  $J = 5$  Hz, phenyl *meta*-CH), 125.1 (s, pyrrolic CH near imine), 122.5 (s, aromatic CH), 110.8 (s, pyrrolic CH near Et-groups), 68.3 (s, THF), 45.3 (s, C-Et<sub>2</sub>), 45.2 (s, *endo*-R- $\text{CH}_2\text{-CH}_3$ ), 32.6 (s, *exo*-R- $\text{CH}_2\text{-CH}_3$ ), 26.2 (s, THF), 19.4 (s, Ar- $\text{CH}_3$ ), 10.4 (s, *exo*-R- $\text{CH}_2\text{-CH}_3$ ), 10.1 ppm (s, *endo*-R- $\text{CH}_2\text{-CH}_3$ );  **$^{15}\text{N}$  NMR** (50.68 MHz,  $\text{CD}_2\text{Cl}_2$ ):  $\delta = -80.6$  (s, iminic N),  $-227.7$  ppm (s, pyrrolic N); **IR** (ATR, 32 scans,  $\text{cm}^{-1}$ ):  $\tilde{\nu} = 2962$  (w), 2925 (w), 2871 (w), 1614 (s), 1595 (m), 1472 (s), 1437 (m), 1404 (m), 1377 (w), 1352 (w), 1321 (m), 1255 (vs), 1220 (m), 1183 (m), 1150 (m), 1140 (s), 1099 (s), 1029 (s), 993 (m), 985 (m), 961 (m), 884 (s), 862 (m), 829 (m), 785 (s), 746 (m), 690 (s), 635 (vs), 608 (m), 596 (m), 571 (s), 542 (m), 515 (s), 503 (s), 466 (s), 443 (m); **Raman** (633 nm, 10 s, 20 scans,  $\text{cm}^{-1}$ ):  $\tilde{\nu} = 3115$  (1), 3059 (1), 2980 (1), 2941 (1), 2919 (1), 2878 (1), 1625 (10), 1593 (5), 1565 (3), 1476 (3), 1408 (1), 1387 (1), 1371 (1), 1358 (1), 1345 (1), 1326 (3),



1299 (1), 1281 (1), 1259 (3), 1184 (1), 1115 (1), 1081 (1), 1047 (1), 1033 (1), 1001 (1), 964 (2), 890 (1), 807 (1), 790 (1), 741 (1), 719 (1), 650 (1), 620 (1), 609 (1), 579 (1), 544 (1), 507 (1), 470 (1), 458 (1), 420 (1), 363 (1), 343 (1), 300 (1), 206 (1), 188 (2), 131 (1), 82 (3);  
**MS** (ESI, m/z, THF): 1035.7 [M-OTf]<sup>+</sup>.

Suitable crystals for single crystal X-ray crystallography were received as described above.

**Figure S6:** NMR, IR and Raman spectra of [1Ag][OTf] (solvent signals indicated by asterisks).

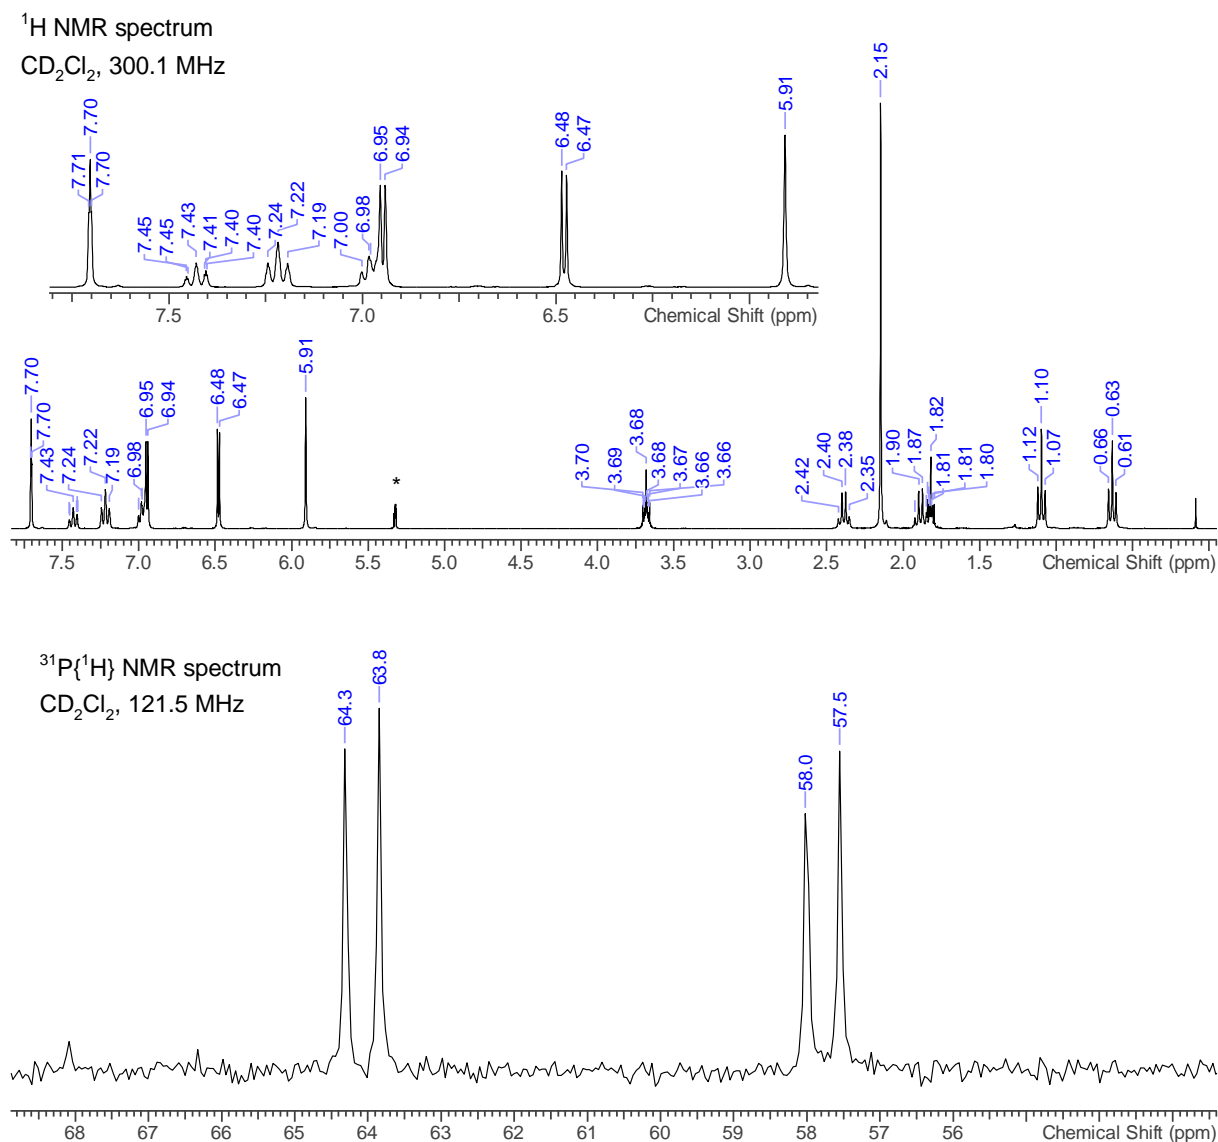

**Figure S6:** continued.

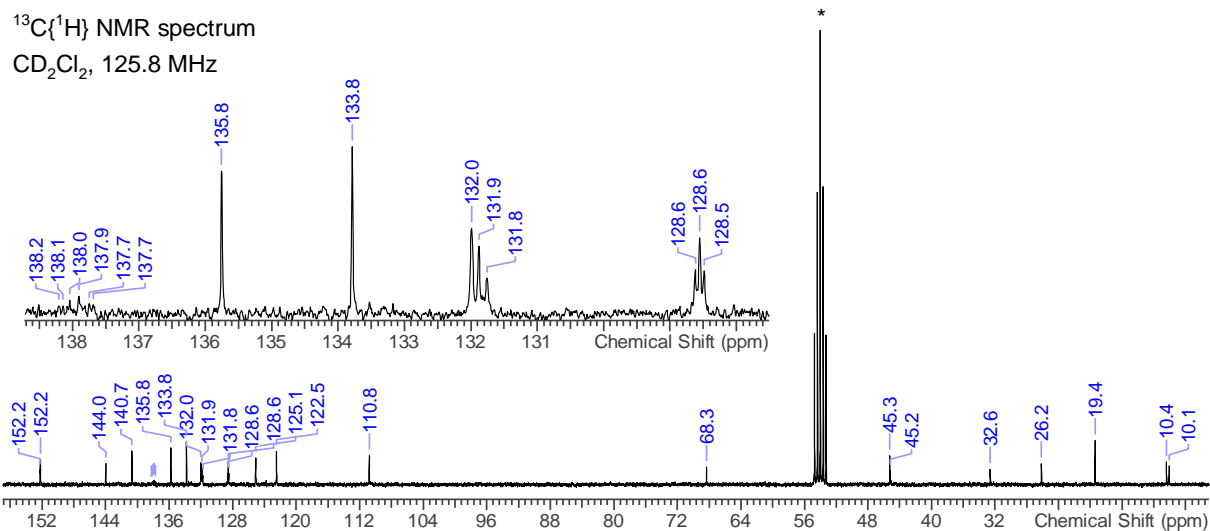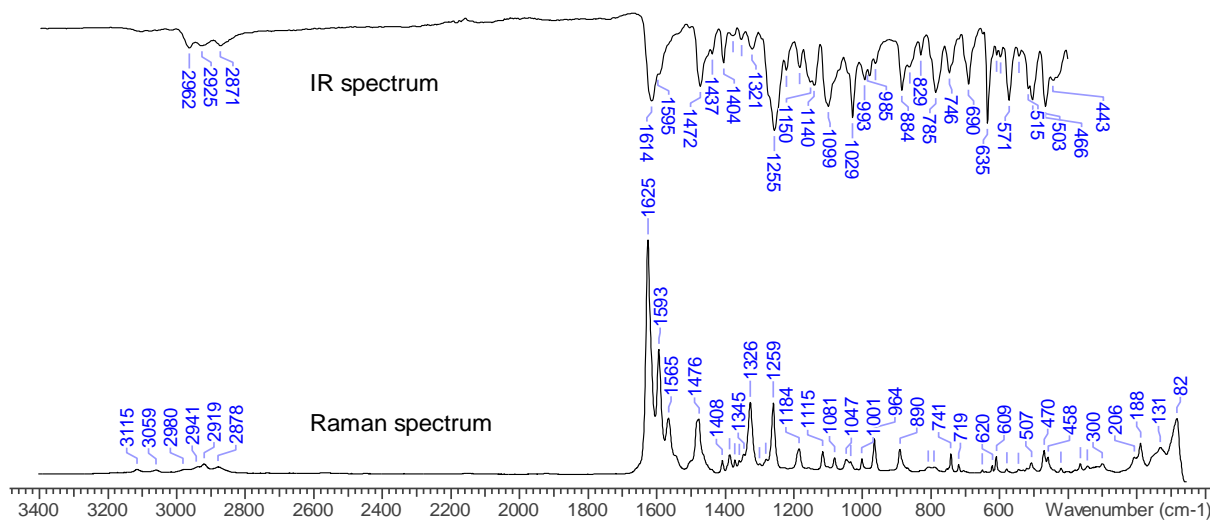

#### 4.5 Pacman phosphane copper(I) complex $[1\text{Cu}][\text{OTf}]$

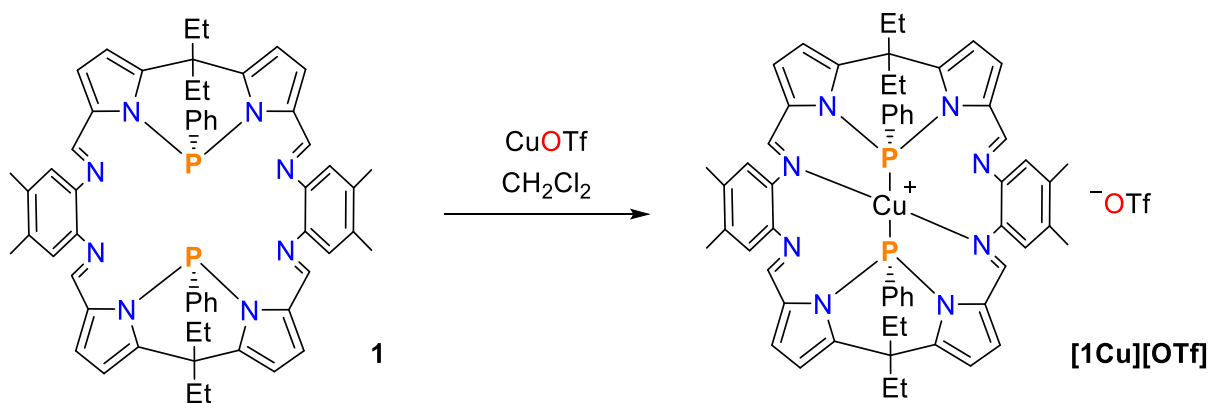

A 25 mL Schlenk flask is filled with **1** (208 mg, 0.20 mmol) and greyish

CuOTf · 0.5 toluene (51.8 mg, 0.20 mmol). The solids are dissolved in dichloromethane (10 mL) giving an orange solution. The solution is concentrated *in vacuo* ( $1 \times 10^{-3}$  mbar) and THF (2 mL) is added dropwise to the solution. The solution is further concentrated *in vacuo* ( $1 \times 10^{-3}$  mbar) and left to stand in warm a water bath in the fridge at 5 °C for crystallization, resulting in the deposition of orange crystals. The supernatant is removed via a syringe. The crystals are washed with dichloromethane (0.5 mL) at -80 °C and dried *in vacuo* ( $1 \times 10^{-3}$  mbar) for 1.5 h at 50 °C. Approximately 0.5 equiv. of THF remain in the product. Yield: 179 mg (0.15 mmol, 75%).

**Mp.:** 263 °C (dec.); **EA** calc. (incl. 0.5 equiv THF) (found) in %: C 62.21 (61.63), H 5.31 (5.30), N 9.51 (9.22), S 2.70 (2.72);  **$^{31}\text{P}\{^1\text{H}\}$  NMR** ( $\text{CD}_2\text{Cl}_2$ , 121.49 MHz):  $\delta$  = 17.8 ppm (s);  **$^1\text{H}$  NMR** ( $\text{CD}_2\text{Cl}_2$ , 500.13 MHz):  $\delta$  = 7.65 (s, 4 H, iminic CH), 7.30 (t,  $^3J(^1\text{H},^1\text{H}) = 7.5$  Hz, 2 H, phenyl *para*-CH), 7.13 (t,  $^3J(^1\text{H},^1\text{H}) = 7.9$  Hz, 4 H, phenyl *meta*-CH), 6.89 (d,  $^3J(^1\text{H},^1\text{H}) = 3.8$  Hz, 4 H, pyrrolic CH near imine), 6.87 (m, 4 H, phenyl *ortho*-CH), 6.40 (d,  $^3J(^1\text{H},^1\text{H}) = 3.8$  Hz, 4 H, pyrrolic CH near Et-groups), 6.33 (s, 4 H, aromatic CH), 3.68 (m, 2.1 H, THF), 2.32 (q,  $^3J(^1\text{H},^1\text{H}) = 7.3$  Hz, 4 H, *exo*-R-CH<sub>2</sub>-CH<sub>3</sub>), 2.23 (s, 12 H, Ar-CH<sub>3</sub>), 1.82 (m, 2.1 H, THF), 1.77 (q,  $^3J(^1\text{H},^1\text{H}) = 7.5$  Hz, 4 H, *endo*-R-CH<sub>2</sub>-CH<sub>3</sub>), 1.08 (t,  $^3J(^1\text{H},^1\text{H}) = 7.3$  Hz, 6 H, *exo*-R-CH<sub>2</sub>-CH<sub>3</sub>) 0.62 ppm (t,  $^3J(^1\text{H},^1\text{H}) = 7.5$  Hz, 6 H, *endo*-R-CH<sub>2</sub>-CH<sub>3</sub>);  **$^{13}\text{C}\{^1\text{H}\}$  NMR** ( $\text{CD}_2\text{Cl}_2$ , 125.76 MHz):  $\delta$  = 152.9 (s, iminic CH), 145.4 (s, pyrrolic C-C-Et<sub>2</sub>), 141.3 (t,  $^1J(^{13}\text{C}, ^{31}\text{P}) = 19$  Hz, phenyl *ipso*-C), 140.4 (s, aromatic C), 136.7 (s, aromatic C-CH<sub>3</sub>), 132.4 (s, pyrrolic C), 130.6 (s, phenyl *para*-CH), 128.8 (t,  $^2J(^{13}\text{C}, ^{31}\text{P}) = 9$  Hz, phenyl *ortho*-CH), 128.0 (t,  $^3J(^{13}\text{C}, ^{31}\text{P}) = 5$  Hz, phenyl *meta*-CH), 125.0 (s, pyrrolic CH near imine), 123.1 (s, aromatic CH), 111.3 (s, pyrrolic CH near Et-groups), 68.3 (s, THF), 44.9 (s, C-Et<sub>2</sub>), 44.0 (s, *endo*-R-CH<sub>2</sub>-CH<sub>3</sub>), 31.0 (s, *exo*-R-CH<sub>2</sub>-CH<sub>3</sub>) 26.1 (s, THF), 19.7 (s, aromatic CH<sub>3</sub>), 10.4 (s, *exo*-R-CH<sub>2</sub>-CH<sub>3</sub>), 10.0 ppm (s, *endo*-R-CH<sub>2</sub>-CH<sub>3</sub>);  **$^{15}\text{N}$  NMR** (50.68 MHz,  $\text{CD}_2\text{Cl}_2$ ):  $\delta$  = -107.2 (s, iminic N), -216.8 ppm (s, pyrrolic N); **IR** (ATR, 32 scans,  $\text{cm}^{-1}$ ):  $\tilde{\nu}$  = 2970 (w), 2956 (w), 2925 (w), 2873 (w), 1618 (m), 1604 (m), 1585 (s), 1515 (w), 1470 (m), 1441 (w), 1410 (m), 1373 (w), 1356 (w), 1311 (m), 1278 (s), 1253 (vs), 1220 (m), 1179 (m), 1150 (m), 1134 (m), 1084 (s), 1062 (m), 1043 (m), 1029 (s), 998 (s), 973 (m), 942 (w),

892 (s), 868 (m), 855 (m), 839 (m), 802 (w), 783 (s), 748 (m), 740 (m), 721 (w), 695 (m), 635 (s), 600 (m), 579 (s), 569 (m), 550 (m), 534 (m), 515 (m), 491 (m), 470 (s), 458 (s), 425 (s); **Raman** (633 nm, 10 s, 20 scans,  $\text{cm}^{-1}$ ):  $\tilde{\nu} = 3107$  (1), 3059 (1), 2972 (1), 2962 (1), 2935 (1), 2922 (1), 2876 (1), 1620 (10), 1605 (8), 1588 (10), 1576 (5), 1519 (3), 1490 (2), 1472 (4), 1445 (1), 1413 (1), 1387 (3), 1370 (1), 1360 (3), 1346 (1), 1330 (2), 1314 (7), 1285 (3), 1260 (4), 1227 (1), 1180 (2), 1105 (2), 1084 (2), 1082 (2), 1047 (1), 1032 (1), 999 (2), 947 (1), 910 (1), 896 (1), 877 (1), 755 (1), 743 (2), 698 (1), 654 (1), 620 (1), 608 (1), 582 (1), 572 (1), 560 (1), 552 (1), 537 (1), 522 (1), 490 (1), 470 (3), 453 (4), 428 (1), 421 (1), 412 (1), 393 (1), 371 (1), 366 (1), 360 (1), 336 (1), 305 (1), 279 (1), 251 (1), 204 (2), 171 (1), 142 (3), 131 (4), 115 (4), 99 (4), 79 (5); **MS** (ESI, m/z, THF): 991.0  $[\text{M}-\text{OTf}]^+$ .

Suitable crystals for single crystal X-ray crystallography were received as described above.

**Figure S7:** NMR, IR and Raman spectra of [1Cu][OTf] (solvent signals indicated by asterisks).

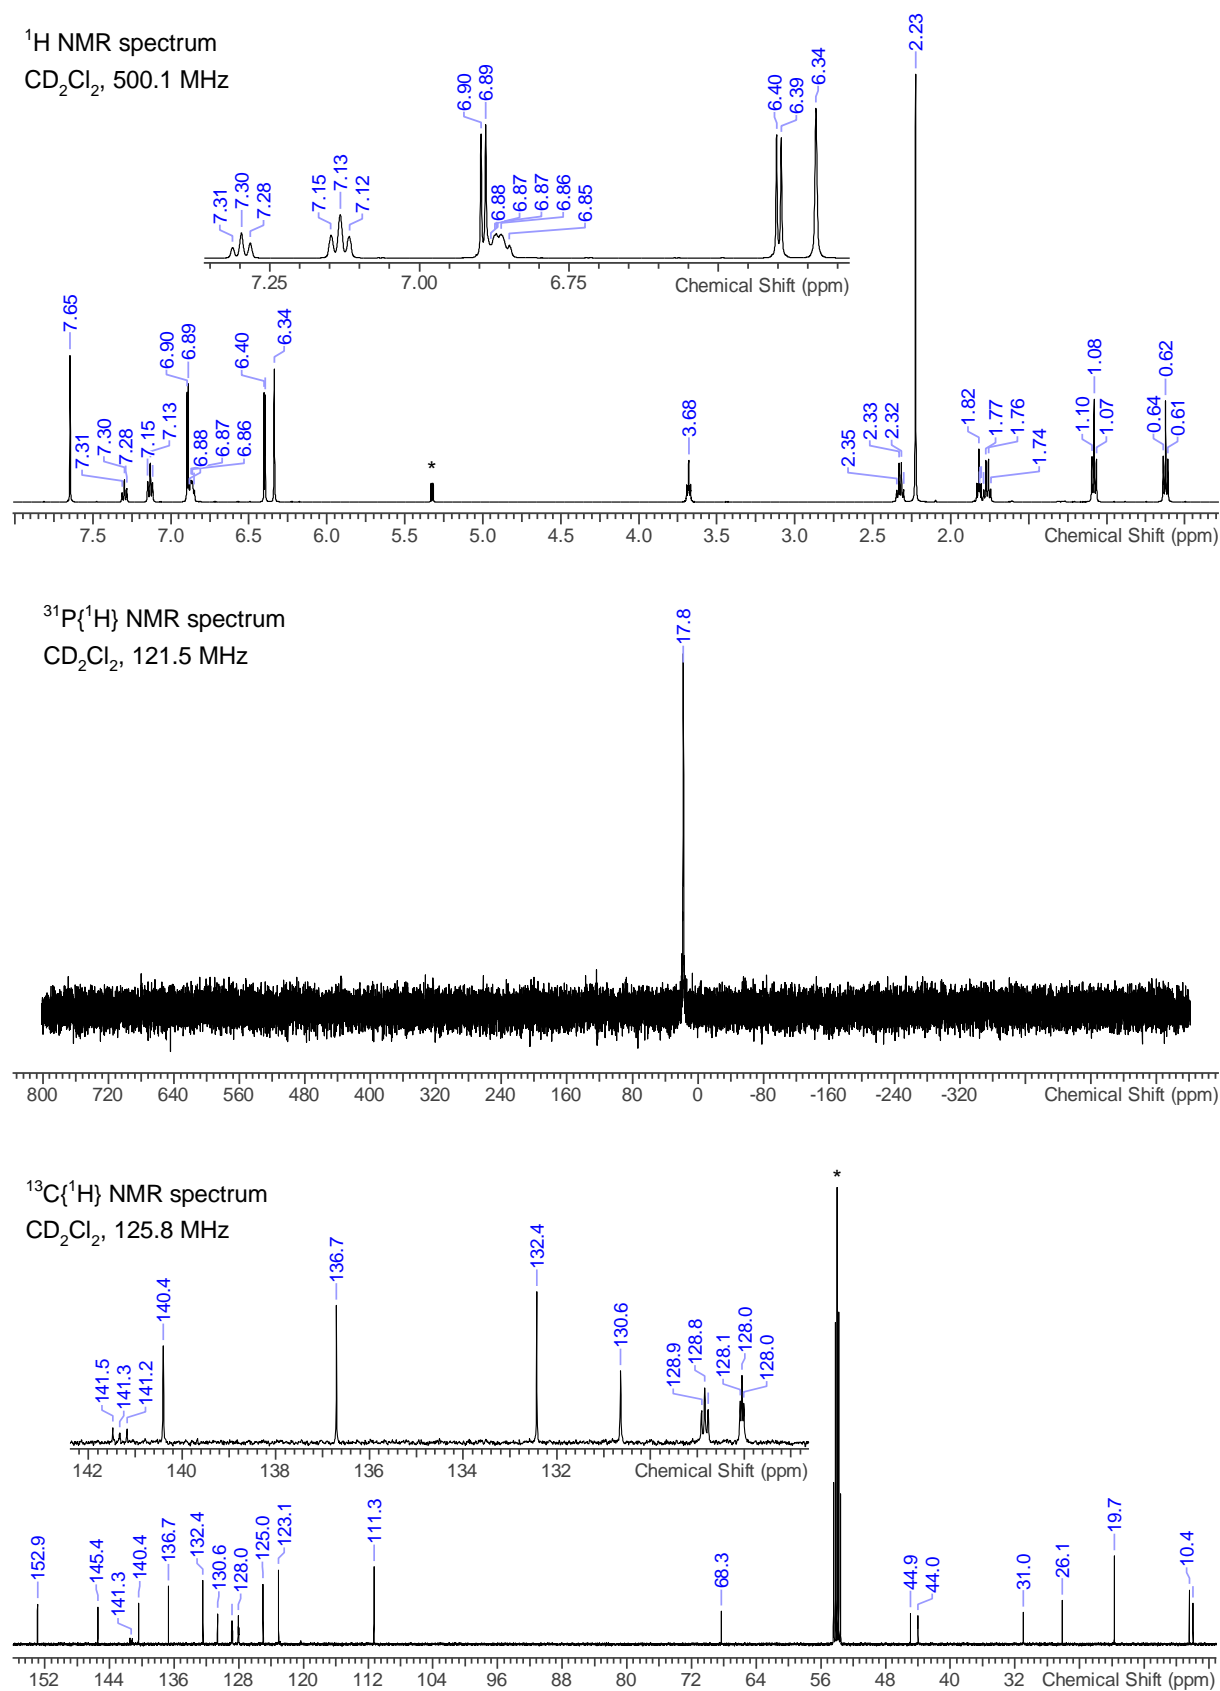

Figure S7: continued.

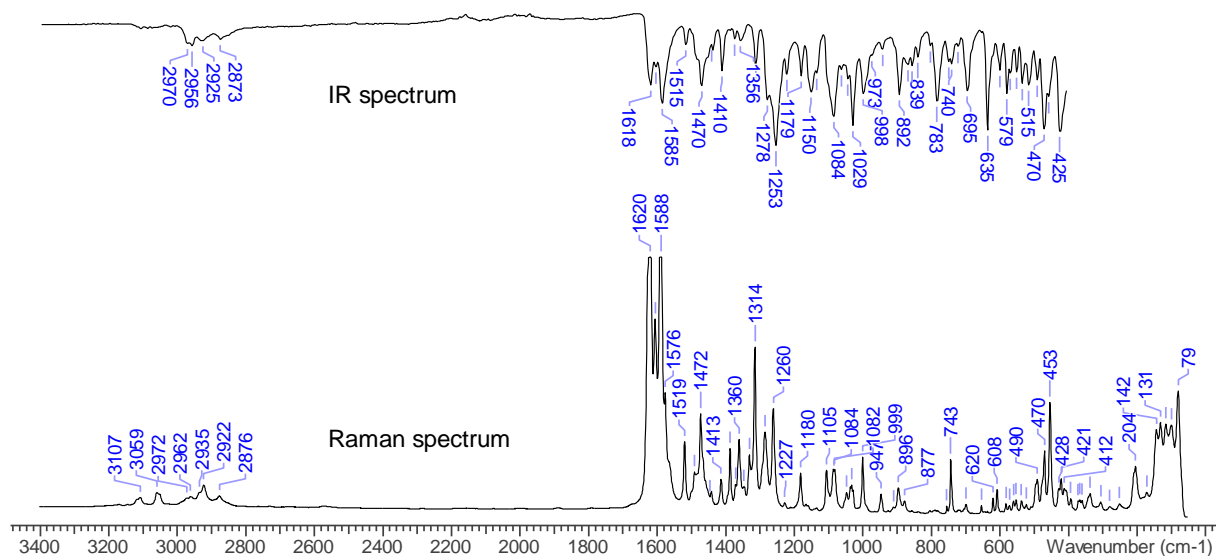

#### 4.6 Pacman phosphane gold(I) complex $[2Au][AuCl_2]$

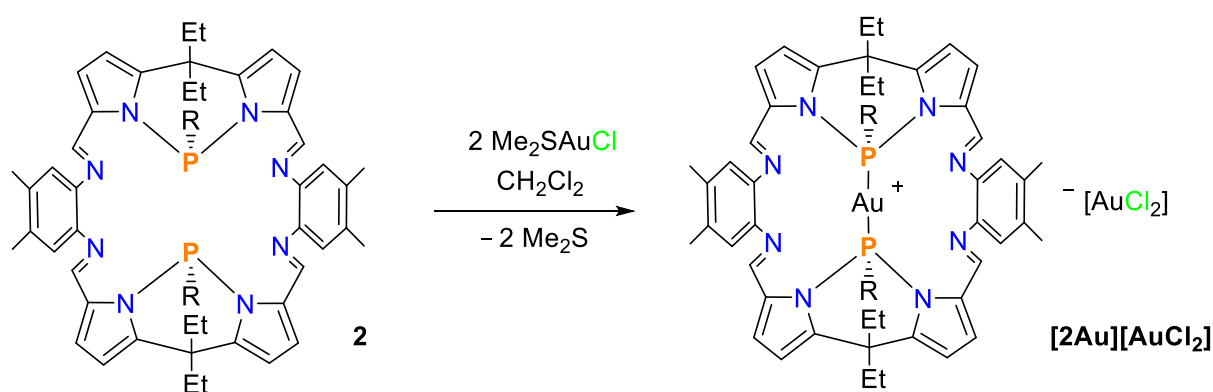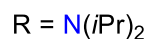

A 25 mL Schlenk flask is filled with **2** (195 mg, 0.20 mmol) and colorless  $\text{Me}_2\text{SAuCl}$  (118 mg, 0.40 mmol). The solids are dissolved in dichloromethane (12 mL) giving an orange solution. After stirring for 1 h at ambient temperature, the solvent is removed *in vacuo* ( $1 \times 10^{-3}$  mbar) and the remaining yellow solids are redissolved in a mixture of dichloromethane (3 mL) and THF (3 mL). This solution is concentrated *in vacuo* ( $1 \times 10^{-3}$  mbar) and is left to stand in a warm water bath in the fridge at 5 °C for crystallization, resulting in the deposition of yellow crystals. The supernatant is

removed via a syringe. The crystals are washed with dichloromethane (0.5 mL) at  $-80$  °C and dried *in vacuo* ( $1 \times 10^{-3}$  mbar) for 2 h at  $50$  °C.

The solution of the second fraction still contains **2** and is therefore dried *in vacuo* ( $1 \times 10^{-3}$  mbar) and redissolved in THF whereas **2** remains as yellow precipitate. The solution is filtered off (pore 4) and the THF is removed from the filtrate *in vacuo* ( $1 \times 10^{-3}$  mbar). The orange product is dried for 2 h at  $50$  °C. 198 mg (0.14 mmol, 68.8%).

**Mp.**  $193$  °C (dec.); **EA** calc. (found) in %: C 48.37 (47.88), H 5.32 (5.32), N 9.73 (9.78);  **$^{31}\text{P}\{^1\text{H}\}$  NMR** ( $\text{CD}_2\text{Cl}_2$ , 121.49 MHz):  $\delta = 95.1$  ppm (s);  **$^1\text{H}$  NMR** ( $\text{CD}_2\text{Cl}_2$ , 500.13 MHz):  $\delta = 8.57$  (s, 4 H, iminic CH), 7.16 (d,  $^3J(^1\text{H},^1\text{H}) = 3.8$  Hz, 4 H, pyrrolic CH near imine), 6.78 (s, 4 H, aromatic CH), 6.41 (d,  $^3J(^1\text{H},^1\text{H}) = 3.8$  Hz, 4 H, pyrrolic CH near Et-groups), 4.39 (br s, 2 H, *iPr*-groups CH), 3.07 (br s, 2 H, *iPr*-groups CH), 2.27 (s, 12 H, Ar- $\text{CH}_3$ ), 2.24 (q,  $^3J(^1\text{H},^1\text{H}) = 7.2$  Hz, 4 H, *exo*-R- $\text{CH}_2\text{-CH}_3$ ), 1.67 (q,  $^3J(^1\text{H},^1\text{H}) = 7.3$  Hz, 4 H, *endo*-R- $\text{CH}_2\text{-CH}_3$ ), 1.09 (br d,  $^3J(^1\text{H},^1\text{H}) = 4.0$  Hz, 12 H, *iPr*-groups  $\text{CH}_3$ ), 0.89 (t,  $^3J(^1\text{H},^1\text{H}) = 7.2$  Hz, 6 H, *exo*-R- $\text{CH}_2\text{-CH}_3$ ), 0.80 (br d,  $^3J(^1\text{H},^1\text{H}) = 4.3$  Hz, 12 H, *iPr*-groups  $\text{CH}_3$ ), 0.38 ppm (t,  $^3J(^1\text{H},^1\text{H}) = 7.3$  Hz, 6 H, *endo*-R- $\text{CH}_2\text{-CH}_3$ );  **$^{13}\text{C}\{^1\text{H}\}$  NMR** ( $\text{CD}_2\text{Cl}_2$ , 75.47 MHz):  $\delta = 152.3$  (s, iminic CH), 144.3 (s, pyrrolic C-C-Et), 142.1 (s, aromatic C), 135.6 (s, aromatic C- $\text{CH}_3$ ), 135.4 (t,  $^2J(^{13}\text{C},^{31}\text{P}) = 3$  Hz, pyrrolic C), 124.7 (br s, pyrrolic CH near imine), 122.2 (s, aromatic CH), 111.1 (br s, pyrrolic CH near Et-groups), 49.0 (br s, *iPr*-groups CH), 45.5 (s, *endo*-R- $\text{CH}_2\text{-CH}_3$ ), 45.1 (s, C-Et<sub>2</sub>), 33.0 (s, *exo*- $\text{CH}_2\text{-CH}_3$ ), 24.9 (br s, *iPr*-groups  $\text{CH}_3$ ), 22.9 (br s, *iPr*-groups  $\text{CH}_3$ ), 19.7 (s, Ar- $\text{CH}_3$ ), 10.1 (s, *endo*- $\text{CH}_2\text{-CH}_3$ ), 9.9 ppm (s, *exo*- $\text{CH}_2\text{-CH}_3$ );  **$^{15}\text{N}$  NMR** (50.68 MHz,  $\text{CD}_2\text{Cl}_2$ ):  $\delta = -72.3$  (s, iminic N),  $-225.8$  ppm (s, pyrrolic N); **IR** (ATR, 32 scans,  $\text{cm}^{-1}$ ):  $\tilde{\nu} = 3098$  (w), 2966 (m), 2929 (m), 2873 (m), 1622 (s), 1608 (s), 1546 (w), 1474 (s), 1402 (m), 1373 (m), 1334 (m), 1301 (m), 1241 (m), 1191 (s), 1175 (m), 1140 (m), 1090 (vs), 1024 (m), 998 (s), 977 (s), 954 (s), 880 (s), 855 (s), 818 (m), 791 (m), 771 (vs), 740 (m), 730 (m), 719 (m), 701 (m), 676 (m), 631 (m), 620 (m), 608 (m), 567 (m), 542 (s), 515 (s), 462 (s), 435 (vs); **Raman** (633 nm, 10 s, 10 scans,  $\text{cm}^{-1}$ ):  $\tilde{\nu} = 3134$  (1), 3119 (1), 3094 (1), 2974 (1), 2938 (1), 2920 (1), 2879 (1), 1623 (10), 1591 (4), 1561 (3), 1500 (2), 1479 (4), 1460 (1), 1390 (2), 1376 (2), 1350 (2), 1307 (1), 1282 (1), 1256 (4),

1235 (1), 1188 (2), 1144 (1), 1113 (1), 1080 (1), 1040 (1), 968 (1), 880 (1), 858 (1), 826 (1), 796 (1), 788 (1), 740 (1), 718 (1), 637 (1), 587 (1), 555 (1), 543 (1), 526 (1), 493 (1), 470 (1), 416 (1), 385 (1), 350 (1), 329 (1), 299 (1), 287 (1), 236 (1), 209 (1), 139 (1), 81 (3); **MS** (ESI, m/z, THF): 1172.0 [M-[AuCl<sub>2</sub>]<sup>-</sup>]<sup>+</sup>.

Suitable crystals for single crystal X-ray crystallography were received as described above.

**Figure S8:** NMR, IR and Raman spectra of [2Au][AuCl<sub>2</sub>] (solvent signals indicated by asterisks).

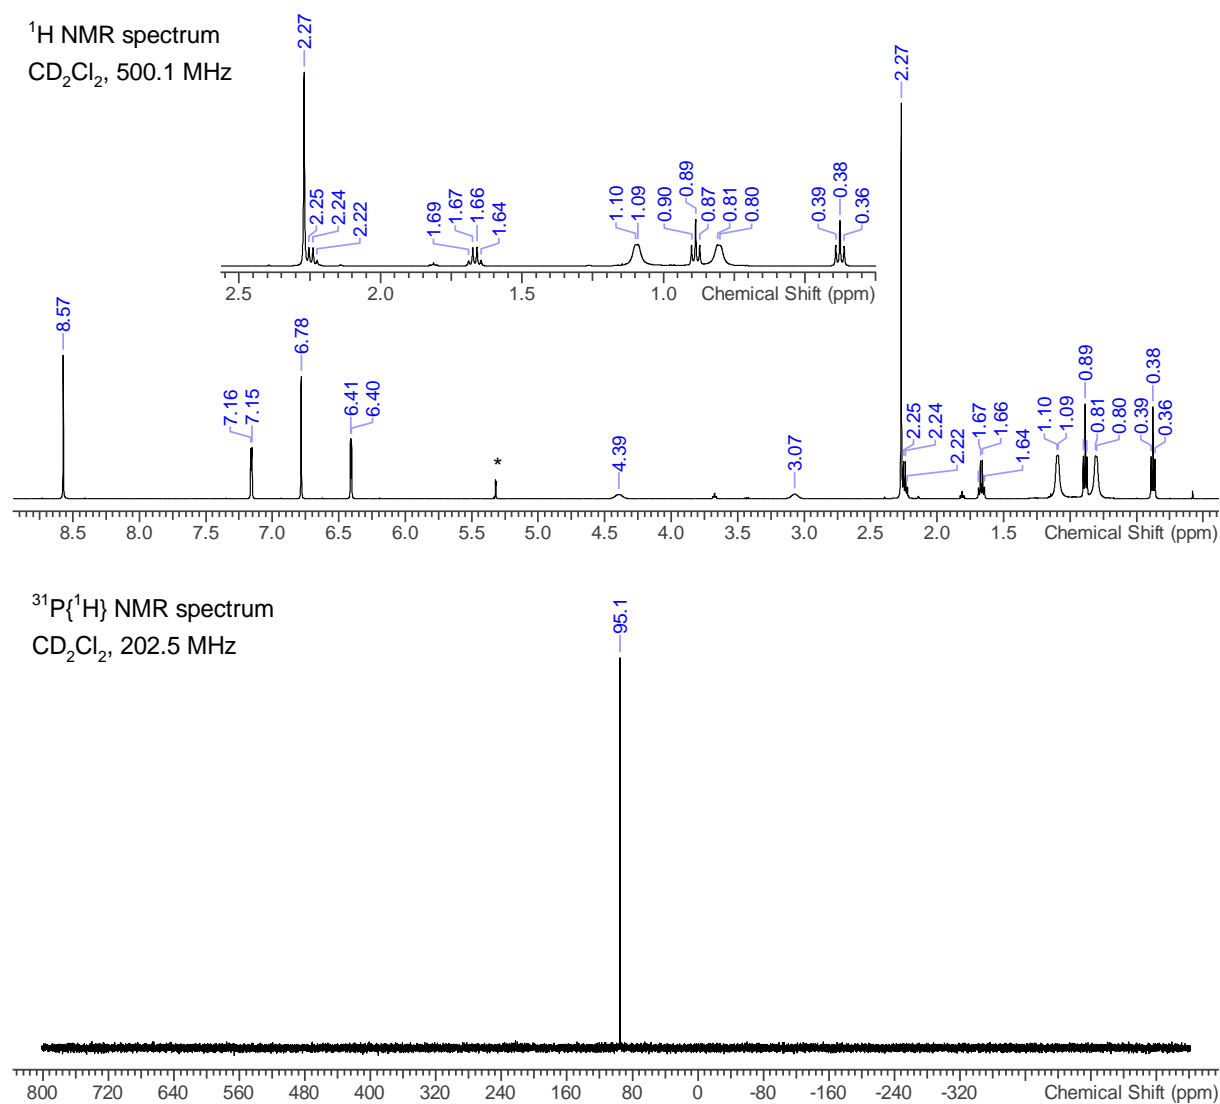



Figure S8 continued.

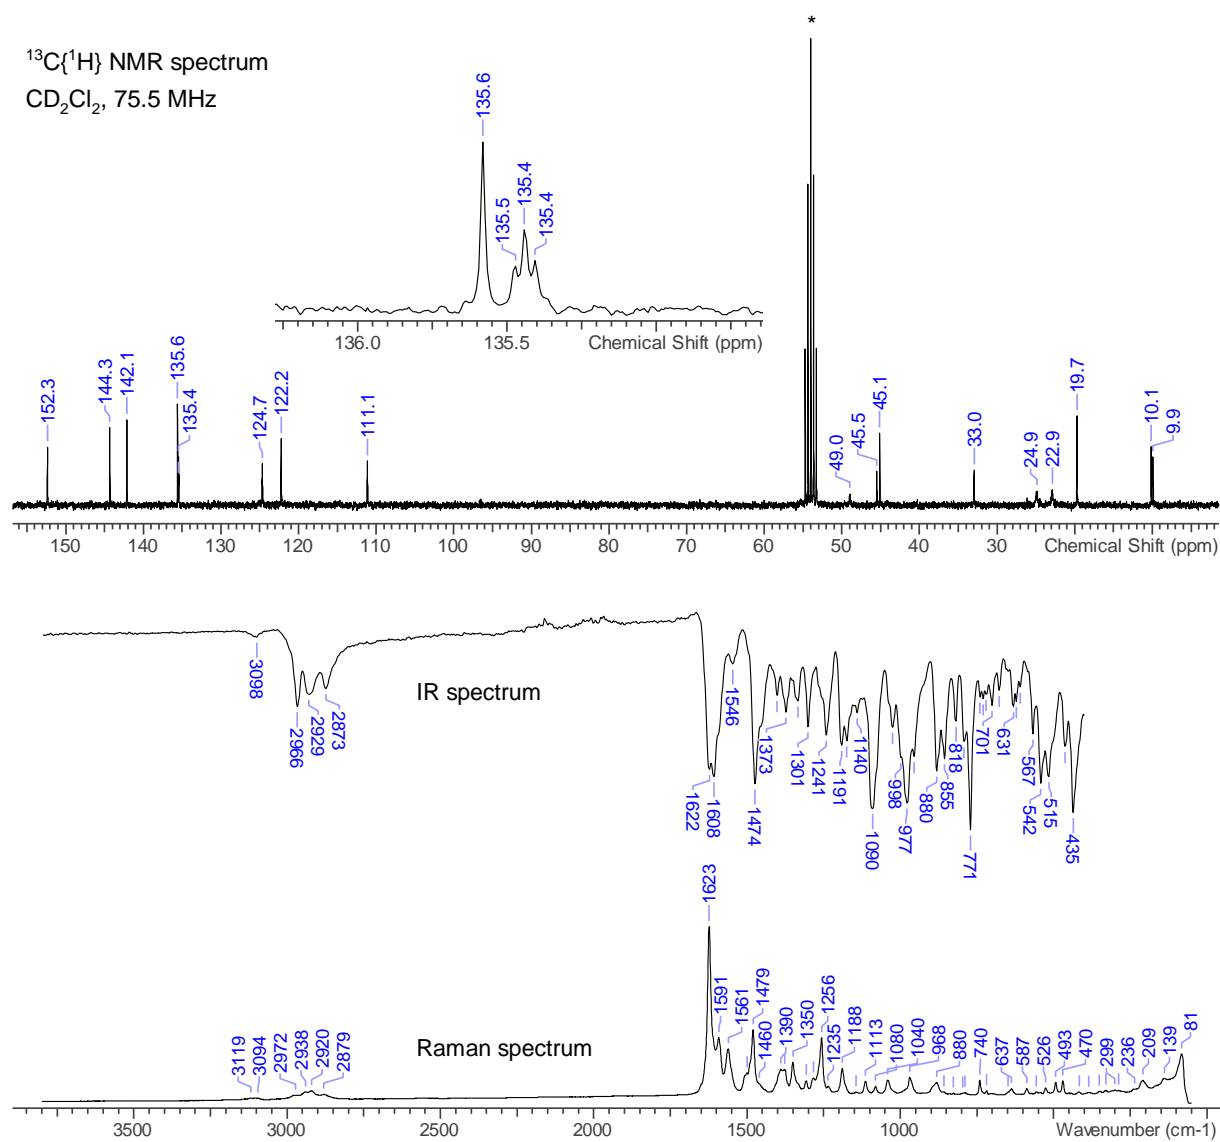

## 4.7 Pacman phosphane silver(I) complex [2Ag·MeCN][OTf]

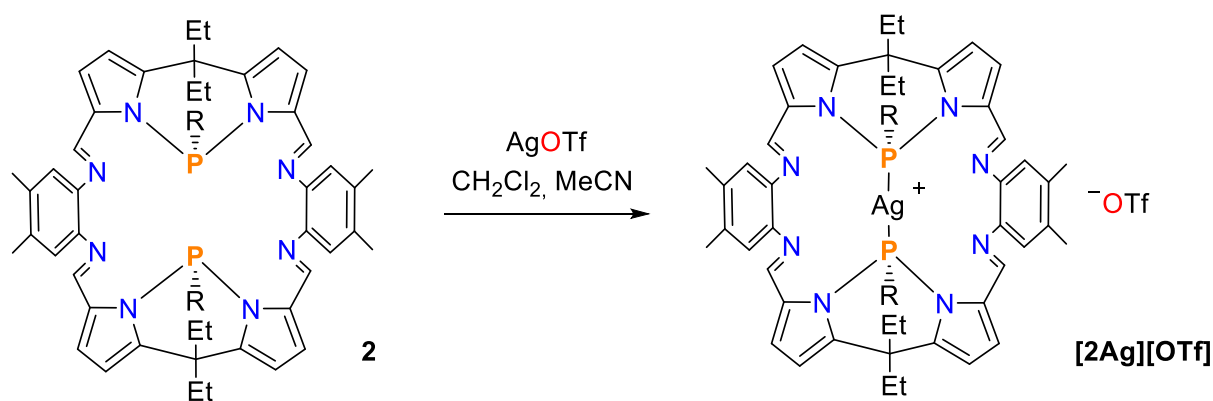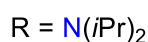

The reaction is carried out in the absence of light, as the AgOTf is light sensitive. A 25 mL Schlenk flask is filled with **2** (204 mg, 0.21 mmol) and colourless AgOTf (53.3 mg, 0.21 mmol). The solids are dissolved in dichloromethane (10 mL) giving an orange-red solution. The reaction solution is stirred for approximately 2 h. Afterwards, the solution is concentrated *in vacuo* ( $1 \times 10^{-3}$  mbar) to about half the volume. THF (2 mL) is added to the concentrated solution. The solution is further concentrated *in vacuo* ( $1 \times 10^{-3}$  mbar) and is left to stand in a warm water bath in the fridge at 5 °C. resulting in the deposition of a yellow precipitate. The supernatant is removed via syringe and is treated as a second fraction analogous to the first. The remaining solids of the first fraction are washed with THF (0.5 mL) at –80 °C and dried *in vacuo* ( $1 \times 10^{-3}$  mbar) for 2 h at 50 °C. Approximately 0.5 equiv. of THF remain in the product. Yield: 133 mg (0.11 mmol, 52%).

**Mp.** 254 °C (dec.); **EA** calc. (incl. 0.5 equiv. THF) (found) in %: C 57.77 (57.30), H 6.36 (6.20), N 11.04 (11.23), S 2.53 (2.35); **<sup>31</sup>P{<sup>1</sup>H} NMR** (CD<sub>2</sub>Cl<sub>2</sub>, 202.46 MHz): δ = 75.4 (d,  $^1J(^{31}\text{P}, ^{107}\text{Ag}) = 670$  Hz, 2 P), 75.4 ppm (d,  $^1J(^{31}\text{P}, ^{109}\text{Ag}) = 771$  Hz, 2 P); **<sup>1</sup>H NMR** (CD<sub>2</sub>Cl<sub>2</sub>, 300.13 MHz): δ = 8.01 (m, 4 H, iminic CH), 6.97 (d,  $^3J(^1\text{H}, ^1\text{H}) = 3.8$  Hz, 4 H, pyrrolic CH near imine), 6.75 (s, 4 H, aromatic CH), 6.34 (d,  $^3J(^1\text{H}, ^1\text{H}) = 3.8$  Hz, 4 H, pyrrolic CH near Et-groups), 3.68 (m, 2.1 H, THF), 2.28 (s, 12 H, Ar-CH<sub>3</sub>), 2.24 (q,  $^3J(^1\text{H}, ^1\text{H}) = 7.2$  Hz, 4 H,

R-CH<sub>2</sub>-CH<sub>3</sub>), 1.82 (m, 2.1 H, THF), 1.54 (q, <sup>3</sup>J(<sup>1</sup>H, <sup>1</sup>H) = 7.4 Hz, 4 H, R-CH<sub>2</sub>-CH<sub>3</sub>), 0.95 (br s, 24 H, *i*Pr-groups CH<sub>3</sub>), 0.93 (t, <sup>3</sup>J(<sup>1</sup>H, <sup>1</sup>H) = 7.2 Hz, 6 H, R-CH<sub>2</sub>-CH<sub>3</sub>), 0.42 ppm (t, <sup>3</sup>J(<sup>1</sup>H, <sup>1</sup>H) = 7.4 Hz, 6 H, R-CH<sub>2</sub>-CH<sub>3</sub>) Due to broadening by dynamic effects the CH protons of the *iso*-propyl substituents were not observed; **<sup>13</sup>C{<sup>1</sup>H} NMR** (CD<sub>2</sub>Cl<sub>2</sub>, 125.76 MHz): δ = 153.6 (s, iminic CH), 144.4 (s, pyrrolic C-C-Et<sub>2</sub>), 143.5 (s, aromatic C), 135.3 (s, aromatic C-CH<sub>3</sub>), 134.7 (s, pyrrolic C), 127.6 (s, pyrrolic CH near imine), 121.0 (s, aromatic CH), 110.2 (s, pyrrolic CH), 68.3 (s, THF), 45.4 (s, R-CH<sub>2</sub>-CH<sub>3</sub>), 44.8 (s, C-Et<sub>2</sub>), 30.8 (s, R-CH<sub>2</sub>-CH<sub>3</sub>), 26.1 (s, THF), 19.7 (s, Ar-CH<sub>3</sub>), 9.7 (s, R-CH<sub>2</sub>-CH<sub>3</sub>), 9.6 ppm (s, R-CH<sub>2</sub>-CH<sub>3</sub>); **<sup>15</sup>N NMR** (50.68 MHz, CD<sub>2</sub>Cl<sub>2</sub>): δ = -219.8 (s, pyrrolic N), -78.5 (s, iminic N); **IR** (ATR, 32 scans, cm<sup>-1</sup>):  $\tilde{\nu}$  = 3110 (w), 2970 (m), 2933 (m), 2873 (m), 1622 (s), 1538 (w), 1474 (s), 1406 (m), 1371 (w), 1327 (w), 1301 (w), 1263 (vs), 1241 (s), 1222 (m), 1179 (s), 1146 (s), 1094 (s), 1066 (m), 1031 (vs), 991 (s), 981 (s), 882 (s), 857 (m), 829 (m), 787 (s), 752 (m), 740 (m), 684 (w), 658 (w), 635 (vs), 608 (m), 569 (s), 517 (s), 497 (m), 476 (m), 449 (s), 423 (m); **Raman** (633 nm, 10 s, 20 scans, cm<sup>-1</sup>):  $\tilde{\nu}$  = 3122 (1), 3105 (1), 2980 (1), 2941 (1), 2923 (1), 2883 (1), 1630 (10), 1591 (6), 1567 (3), 1545 (2), 1499 (2), 1479 (4), 1409 (2), 1390 (2), 1357 (2), 1339 (3), 1303 (1), 1283 (2), 1260 (4), 1184 (2), 1143 (1), 1107 (2), 1078 (1), 1042 (2), 1031 (2), 992 (1), 962 (2), 887 (2), 828 (1), 807 (1), 795 (1), 742 (2), 719 (1), 699 (1), 612 (2), 573 (1), 545 (1), 500 (1), 479 (1), 465 (2), 415 (1), 394 (1), 371 (1), 347 (1), 309 (2), 209 (2), 172 (2), 137 (3), 79 (5); **MS** (ESI, m/z, THF): 1081.5 [M-OTf]<sup>+</sup>.

To obtain suitable crystals for single crystal X-ray crystallography, **[2Ag·MeCN][OTf]** is dissolved in acetonitrile. The cloudy, red solution is filtered over silica gel (pore 4). The filtrate is reduced *in vacuo* (1×10<sup>-3</sup> mbar) and left to stand in a water bath in the fridge at 5 °C overnight. yielding single crystals of the MeCN-adduct **[2Ag·MeCN][OTf]**.

**Figure S9:** NMR, IR and Raman spectra of **[2Ag·MeCN][OTf]** (solvent signals indicated by asterisks).

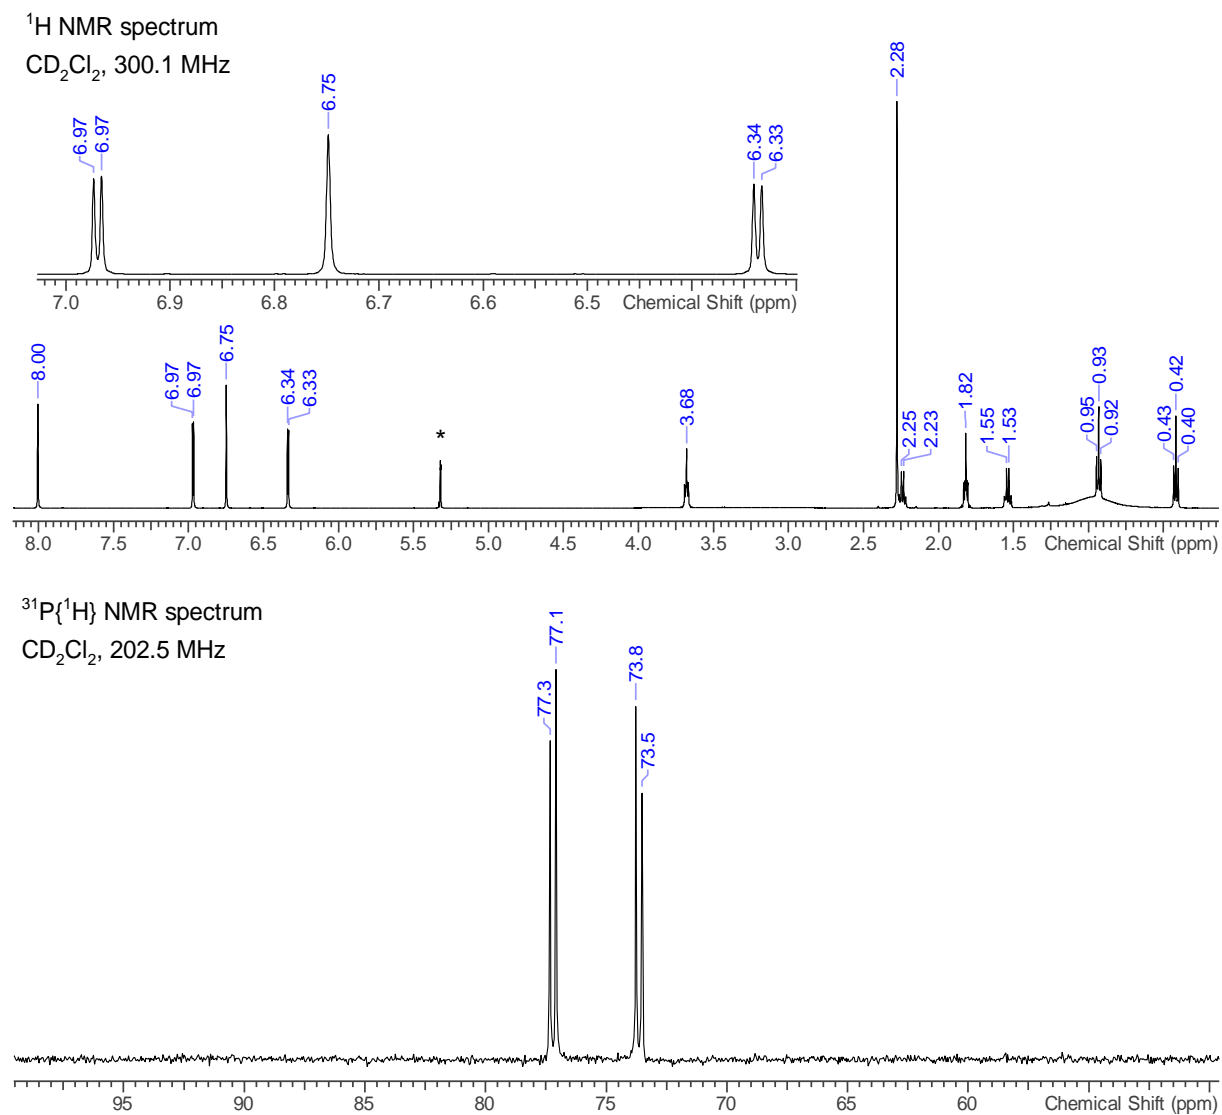

Figure S9 continued.

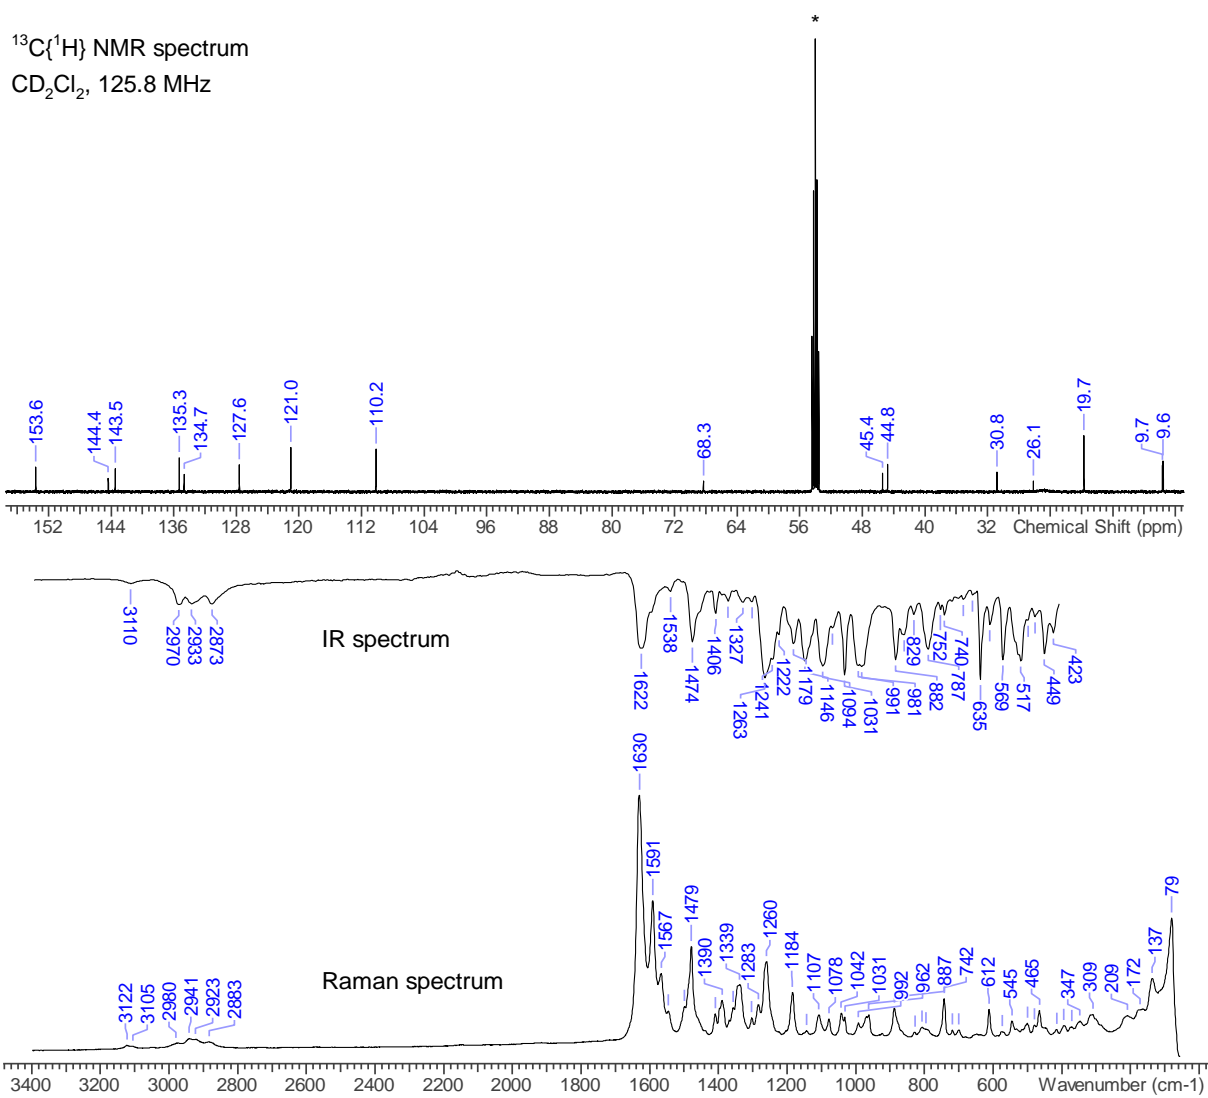

## 4.8 Pacman phosphane copper(I) complex [2Cu·OTf]

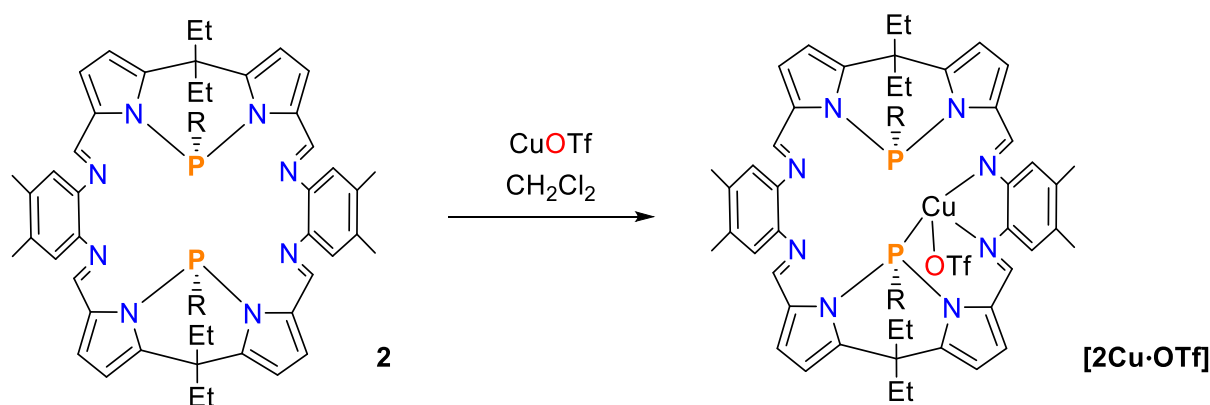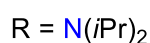

A 25 mL Schlenk flask is filled with **2** (240 mg, 0.24 mmol) and greyish CuOTf · 0.5 toluene (63.0 mg, 0.24 mmol). The solids are dissolved in dichloromethane (10 mL), giving an orange-red solution. The solution is stirred for 2 h. Afterwards, the dichloromethane is removed *in vacuo* ( $1 \times 10^{-3}$  mbar) and the remaining yellow-orange solids are dissolved in THF (5 mL). The solution is filtered over silica gel. Toluene (2 mL) is added dropwise to the filtrate. The solution is concentrated *in vacuo* ( $1 \times 10^{-3}$  mbar) and is left to stand in a warm water bath in the fridge at 5 °C overnight, resulting in the deposition of orange crystals. The supernatant is removed via syringe and the remaining crystals are washed two times with THF (2 × 0.5 mL) at –80 °C. The crystals are dried *in vacuo* ( $1 \times 10^{-3}$  mbar) for 3 h at 50 °C. Since the dried product still contains toluene the product is washed with THF three times (3 × 1 mL) and dried *in vacuo* ( $1 \times 10^{-3}$  mbar) for 2 h at 60 °C each time. Approximately 0.75 equiv. of THF remain in the product. Yield: 224 mg (0.18 mmol, 75%).

**Mp.** 216 °C (dec.); **EA** calc. (incl. 0.75 equiv. THF) (found) in %: C 59.96 (59.57), H 6.66 (6.36), N 11.28 (11.43), S 2.58 (2.64);  **$^{31}\text{P}\{^1\text{H}\}$  NMR** ( $\text{CD}_2\text{Cl}_2$ , 121.49 MHz):  $\delta = 69.0$  ppm (s);  **$^1\text{H}$  NMR** ( $\text{CD}_2\text{Cl}_2$ , 300.13 MHz):  $\delta = 8.34$  (s, 4 H, iminic CH), 7.07 (d,  $^3J(^1\text{H}, ^1\text{H}) = 3.8$  Hz, 4 H, pyrrolic CH near imine), 6.89 (s, 4 H, aromatic CH), 6.34 (d,  $^3J(^1\text{H}, ^1\text{H}) = 3.8$  Hz, 4 H, pyrrolic CH near Et-groups), 3.45 - 3.78 (m, 3.1 THF) 2.29 (s, 12 H, Ar- $\text{CH}_3$ ), 2.21 (q,

$^3J(^1H, ^1H) = 7.4$  Hz, 4 H, R-CH<sub>2</sub>-CH<sub>3</sub>), 1.82 (m, 3.1THF), 1.52 (q,  $^3J(^1H, ^1H) = 7.5$  Hz, 4 H, R-CH<sub>2</sub>-CH<sub>3</sub>), 0.94 (br s, 24 H, *i*Pr-groups CH<sub>3</sub>), 0.88 (t,  $^3J(^1H, ^1H) = 7.4$  Hz, 6 H, R-CH<sub>2</sub>-CH<sub>3</sub>), 0.42 ppm (t,  $^3J(^1H, ^1H) = 7.5$  Hz, 6 H, R-CH<sub>2</sub>-CH<sub>3</sub>) Due to broadening by dynamic effects, the CH proton of the *iso*-propyl substituents were not observed;  **$^{13}C\{^1H\}$  NMR** (CD<sub>2</sub>Cl<sub>2</sub>, 125.76 MHz):  $\delta = 154.2$  (s, iminic CH), 145.3 (s, pyrrolic C-C-Et), 141.4 (s, aromatic C), 136.0 (s, aromatic C-CH<sub>3</sub>), 134.8 (s, pyrrolic C), 125.7 (s, pyrrolic CH near imine), 122.8 (s, aromatic CH), 110.9 (s, pyrrolic CH near Et-groups), 68.3 (s, THF), 44.8 (s, C-Et<sub>2</sub>), 44.5 (s, R-CH<sub>2</sub>-CH<sub>3</sub>), 31.2 (s, R-CH<sub>2</sub>-CH<sub>3</sub>), 26.1 (s, THF), 19.8 (s, Ar-CH<sub>3</sub>), 9.7 (s, R-CH<sub>2</sub>-CH<sub>3</sub>), 9.6 ppm (s, R-CH<sub>2</sub>-CH<sub>3</sub>);  **$^{15}N$  NMR** (50.68 MHz, CD<sub>2</sub>Cl<sub>2</sub>):  $\delta = -222.7$  (s, pyrrolic N),  $-95.1$  (s, iminic N); **IR** (ATR, 32 scans, cm<sup>-1</sup>):  $\tilde{\nu} = 2966$  (m), 2933 (w), 2875 (w), 1632 (m), 1608 (m), 1587 (m), 1529 (w), 1474 (m), 1406 (m), 1373 (w), 1327 (w), 1299 (w), 1259 (s), 1222 (m), 1193 (m), 1173 (m), 1146 (s), 1088 (s), 1029 (s), 983 (s), 880 (m), 853 (m), 829 (m), 779 (s), 752 (m), 740 (m), 723 (m), 695 (w), 678 (w), 635 (vs), 571 (s), 550 (m), 534 (s), 515 (s), 466 (s), 425 (s); **Raman** (633 nm, 5 s, 10 scans, cm<sup>-1</sup>):  $\tilde{\nu} = 3125$  (1), 2973 (1), 2939 (1), 2924 (1), 2882 (1), 1610 (10), 1584 (10), 1567 (6), 1520 (2), 1480 (4), 1404 (3), 1378 (2), 1358 (2), 1341 (3), 1326 (2), 1302 (2), 1288 (2), 1266 (4), 1237 (1), 1190 (3), 1183 (2), 1176 (2), 1152 (1), 1141 (1), 1104 (2), 1092 (1), 1082 (1), 1038 (1), 1027 (1), 971 (1), 956 (3), 896 (1), 875 (1), 868 (1), 835 (1), 820 (1), 796 (1), 757 (1), 743 (2), 732 (1), 728 (1), 647 (1), 639 (1), 630 (1), 609 (1), 594 (1), 583 (1), 575 (1), 565 (1), 552 (1), 536 (1), 523 (1), 499 (1), 461 (1), 437 (1), 395 (1), 381 (1), 363 (1), 348 (1), 317 (1), 245 (1), 211 (1), 175 (1), 149 (1), 96 (2); **MS** (ESI, m/z, THF): 1037.7 [M-OTf]<sup>+</sup>.

Suitable crystals for single crystal X-ray crystallography were received as described above.

**Figure S10:** NMR, IR and Raman spectra of **[2Cu-OTf]** (solvent signals indicated by asterisks).

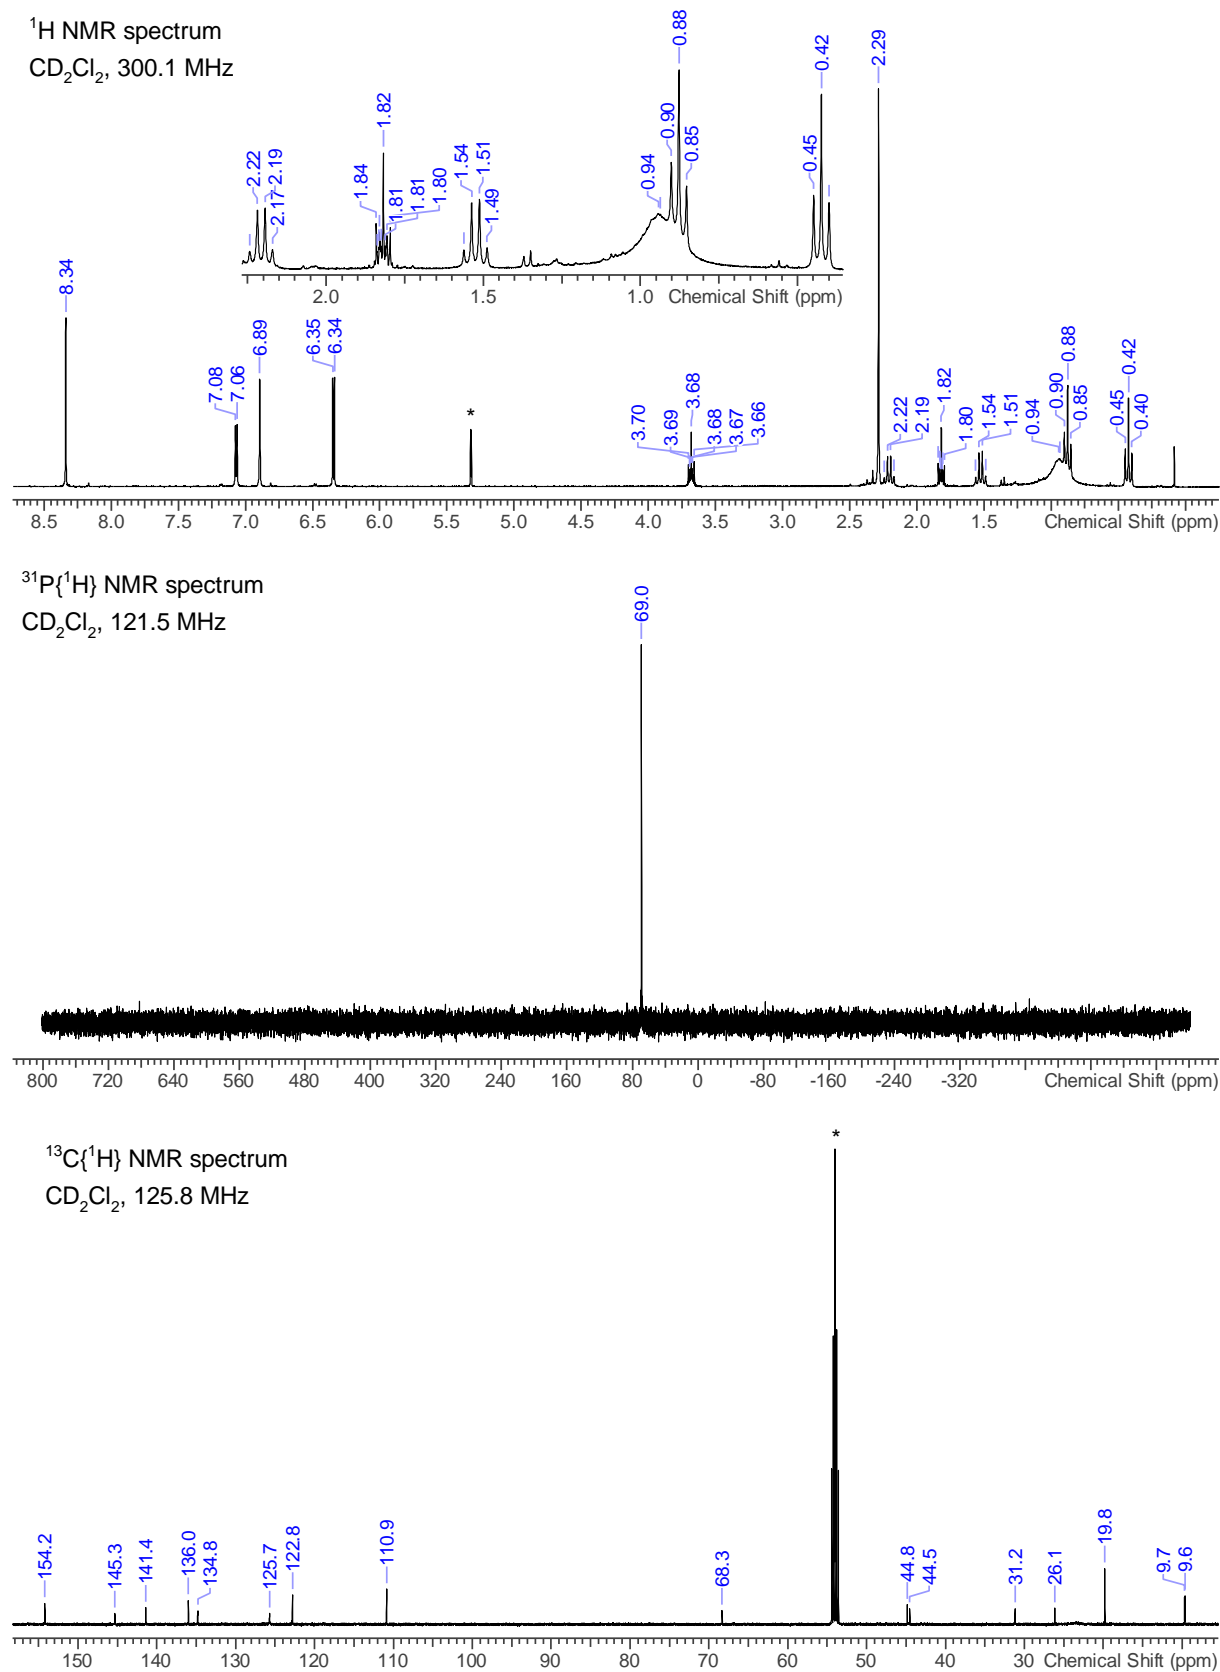



Figure S10 continued.

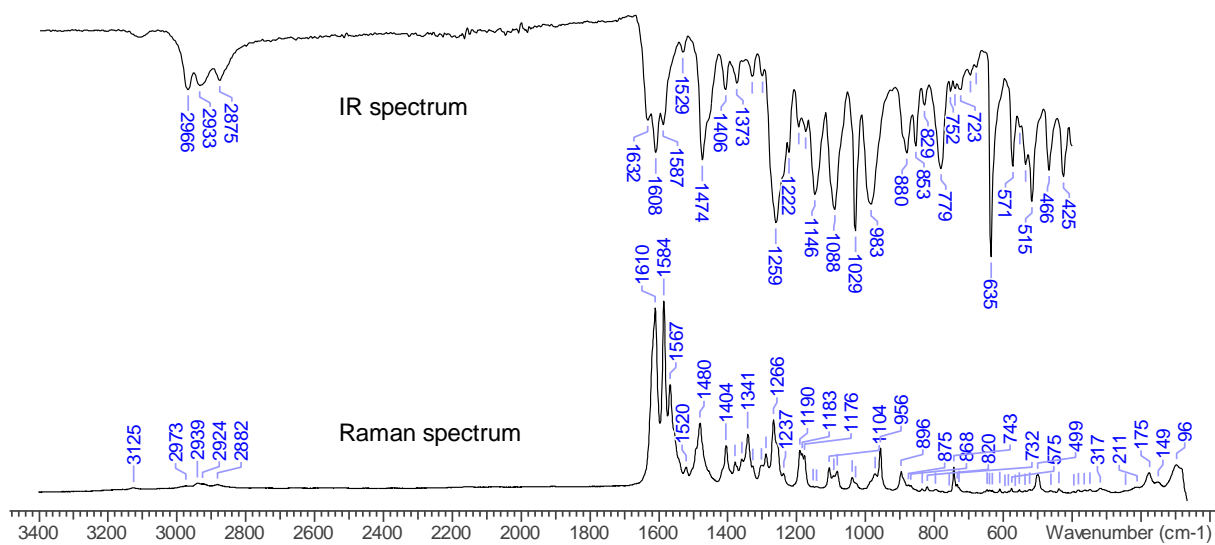

## 5 Computational details

### 5.1 General remarks

Computations were carried out using Gaussian09<sup>[7]</sup> and the standalone version of NBO 6.0.<sup>[8–11]</sup>

Structure optimizations employed the DFT functional PBE<sup>[12,13]</sup> in conjunction with Grimme's dispersion correction D3(BJ)<sup>[14,15]</sup> and the def2-TZVP basis set<sup>[16]</sup> (notation PBE-D3/def2TZVP). The resolution of identity (RI) approximation was employed, using the appropriate Coulomb fitting basis of the Weigend group.<sup>[17]</sup> All structures were fully optimized and confirmed as minima by frequency analyses.

Please note that all computations were carried out for single, isolated molecules in the gas phase (ideal gas approximation). There may well be significant differences between gas phase and condensed phase.

## 5.2 Summary of calculated data

**Table S7.** Summary of calculated data, including electronic energies and thermal corrections.

| Compd.                         | PG             | Opt. method     | $E_{\text{tot}}^{[a]}$ | $\Delta G^{[b]}$ |
|--------------------------------|----------------|-----------------|------------------------|------------------|
| <b>1</b>                       | C <sub>1</sub> | PBE-D3/def2TZVP | -3363.31797            | 0.9026           |
| <b>2</b>                       | C <sub>1</sub> |                 | -3483.5301             | 1.1003           |
| <b>[1Au][Cl]</b>               | C <sub>1</sub> |                 | -3499.0214             | 0.9049           |
| <b>[1Ag][OTf]</b>              | C <sub>1</sub> |                 | -5003.5449             | 0.9095           |
| <b>[1Cu][OTf]</b>              | C <sub>1</sub> |                 | -3510.2376             | 0.9042           |
| <b>[2Au][AuCl<sub>2</sub>]</b> | C <sub>1</sub> |                 | -3619.2260             | 1.1042           |
| <b>[2Ag·MeCN][OTf]</b>         | C <sub>1</sub> |                 | -5120.3019             | 1.1194           |
| <b>[2Cu·OTf]</b>               | C <sub>1</sub> |                 | -3627.2091             | 1.1177           |

[a] Total SCF energy in a.u.; [b] thermal correction to Gibbs energy in a.u. (298 K unless stated otherwise).

## 5.3 Summary of NBO analyses

**Table S8.** Donor-acceptor energies  $E_{\text{DA}}$  for the interaction of N3 and P1 with the metals in **1Au<sup>+</sup>**, **1Ag<sup>+</sup>** and **1Cu<sup>+</sup>**.

| Donor-acceptor | <b>1Au<sup>+</sup></b>                     |                                              | <b>1Ag<sup>+</sup></b>                     |                                              | <b>1Cu<sup>+</sup></b>                     |                                              |
|----------------|--------------------------------------------|----------------------------------------------|--------------------------------------------|----------------------------------------------|--------------------------------------------|----------------------------------------------|
|                | $E_{\text{DA}}$<br>[kJ mol <sup>-1</sup> ] | $E_{\text{DA}}$<br>[kcal mol <sup>-1</sup> ] | $E_{\text{DA}}$<br>[kJ mol <sup>-1</sup> ] | $E_{\text{DA}}$<br>[kcal mol <sup>-1</sup> ] | $E_{\text{DA}}$<br>[kJ mol <sup>-1</sup> ] | $E_{\text{DA}}$<br>[kcal mol <sup>-1</sup> ] |
| N3-M1          | 21.67                                      | 5.18                                         | 37.53                                      | 8.97                                         | 118.87                                     | 28.41                                        |
| P1-M1          | 781.74                                     | 186.84                                       | 296.02                                     | 70.75                                        | 238.91                                     | 57.10                                        |

**Table S9.** Donor-acceptor energies  $E_{DA}$  for the interaction of N7 and P1 with the metals in **2Au<sup>+</sup>**, **[2Ag·MeCN]<sup>+</sup>** and **[2Cu·OTf]**.

| Donor-acceptor  | <b>2Au<sup>+</sup></b>              |                                       | <b>[2Ag·MeCN]<sup>+</sup></b>       |                                       | <b>[2Cu·OTf]</b>                    |                                       |
|-----------------|-------------------------------------|---------------------------------------|-------------------------------------|---------------------------------------|-------------------------------------|---------------------------------------|
|                 | $E_{DA}$<br>[kJ mol <sup>-1</sup> ] | $E_{DA}$<br>[kcal mol <sup>-1</sup> ] | $E_{DA}$<br>[kJ mol <sup>-1</sup> ] | $E_{DA}$<br>[kcal mol <sup>-1</sup> ] | $E_{DA}$<br>[kJ mol <sup>-1</sup> ] | $E_{DA}$<br>[kcal mol <sup>-1</sup> ] |
| N7-M1           | 12.38                               | 2.96                                  | 22.59                               | 5.40                                  | 115.77                              | 27.67                                 |
| P1-M1           | 507.77                              | 121.36                                | 245.48                              | 58.67                                 | 244.85                              | 58.52                                 |
| acetonitrile-M1 | -                                   | -                                     | 55.27                               | 13.21                                 | -                                   | -                                     |
| O1-M1           | -                                   | -                                     | -                                   | -                                     | 64.27                               | 15.36                                 |

**Table S10.** Natural charges on P1 in **1** - **[2Cu·OTf]**.

| Compound               | natural charge on P1<br>[e] | Compound                      | natural charge on P1<br>[e]                |
|------------------------|-----------------------------|-------------------------------|--------------------------------------------|
| <b>1</b>               | 1.22                        | <b>2</b>                      | 1.36                                       |
| <b>1Au<sup>+</sup></b> | 1.31                        | <b>2Au<sup>+</sup></b>        | 1.50                                       |
| <b>1Ag<sup>+</sup></b> | 1.19                        | <b>[2Ag·MeCN]<sup>+</sup></b> | 1.34                                       |
| <b>1Cu<sup>+</sup></b> | 1.11                        | <b>[2Cu·OTf]</b>              | 1.28 <sup>[a]</sup><br>1.37 <sup>[b]</sup> |

<sup>[a]</sup> natural charge on P2 (coordinated to Cu); <sup>[b]</sup> natural charge on P1(not coordinated to Cu).

## 6 References

- [1] C. B. Fischer, S. Xu, H. Zipse, *Chem. - Eur. J.* **2006**, *12*, 5779–5784.
- [2] L. Eickhoff, L. Ohms, J. Bresien, A. Villinger, D. Michalik, A. Schulz, *Chem. - Eur. J.* **2022**, *28*, e202103983.
- [3] G. M. Sheldrick, *Acta Crystallogr. Sect. A Found. Adv.* **2015**, *71*, 3–8.
- [4] G. M. Sheldrick, *Acta Crystallogr. Sect. C Struct. Chem.* **2015**, *71*, 3–8.
- [5] G. M. Sheldrick, *SADABS Version 2*, University of Göttingen, Germany, **2004**.
- [6] E. Drent, R. van Dijk, R. van Ginkel, B. van Oort, R. I. Pugh, *Chem. Commun.* **2002**, *2*, 964–965.
- [7] *Gaussian 09, Revision E.01*, M. J. Frisch, G. W. Trucks, H. B. Schlegel, G. E. Scuseria, M. A. Robb, J. R. Cheeseman, G. Scalmani, V. Barone, B. Mennucci, G. A. Petersson, H. Nakatsuji, M. Caricato, X. Li, H. P. Hratchian, A. F. Izmaylov, J. Bloino, G. Zheng, J. L. Sonnenberg, M. Hada, M. Ehara, K. Toyota, R. Fukuda, J. Hasegawa, M. Ishida, T. Nakajima, Y. Honda, O. Kitao, H. Nakai, T. Vreven, J. A. Montgomery Jr., J. E. Peralta, F. Ogliaro, M. Bearpark, J. J. Heyd, E. Brothers, K. N. Kudin, V. N. Staroverov, T. Keith, R. Kobayashi, J. Normand, K. Raghavachari, A. Rendell, J. C. Burant, S. S. Iyengar, J. Tomasi, M. Cossi, N. Rega, J. M. Millam, M. Klene, J. E. Knox, J. B. Cross, V. Bakken, C. Adamo, J. Jaramillo, R. Gomperts, R. E. Stratmann, O. Yazyev, A. J. Austin, R. Cammi, C. Pomelli, J. W. Ochterski, R. L. Martin, K. Morokuma, V. G. Zakrzewski, G. A. Voth, P. Salvador, J. J. Dannenberg, S. Dapprich, A. D. Daniels, O. Farkas, J. B. Foresman, J. V. Ortiz, J. Cioslowski, D. J. Fox, Gaussian, Inc., Wallingford CT, **2013**.
- [8] E. D. Glendening, J. K. Badenhoop, A. E. Reed, J. E. Carpenter, J. A. Bohmann, C. M. Morales, C. R. Landis, F. Weinhold, *NBO 6.0*, Theoretical Chemistry Institute, University of Wisconsin, Madison, **2013**.
- [9] J. E. Carpenter, F. Weinhold, *J. Mol. Struct.: THEOCHEM* **1988**, *169*, 41–62.
- [10] F. Weinhold, J. E. Carpenter, in *Struct. Small Mol. Ions* (Eds.: R. Naaman, Z. Vager), Springer, Boston, MA, **1988**, pp. 227–236.
- [11] F. Weinhold, C. R. Landis, *Valency and Bonding. A Natural Bond Orbital Donor-Acceptor Perspective*, Cambridge University Press, **2005**.
- [12] J. P. Perdew, K. Burke, M. Ernzerhof, *Phys. Rev. Lett.* **1997**, *78*, 1396–1396.
- [13] J. P. Perdew, K. Burke, M. Ernzerhof, *Phys. Rev. Lett.* **1996**, *77*, 3865–3868.
- [14] S. Grimme, J. Antony, S. Ehrlich, H. Krieg, *J. Chem. Phys.* **2010**, *132*, 154104.
- [15] S. Grimme, S. Ehrlich, L. Goerigk, *J. Comput. Chem.* **2011**, *32*, 1456–1465.
- [16] F. Weigend, R. Ahlrichs, *Phys. Chem. Chem. Phys.* **2005**, *7*, 3297–305.

[17] F. Weigend, *Phys. Chem. Chem. Phys.* **2006**, *8*, 1057–1065.
